# Supplementary material
Source: PubMed Central journal article supplement (PMC3156056)

Supporting Information 2:

# **Stereoselective *C*-Glycosidation with Achiral and Enantioenriched Allenylsilanes**

Ryan A. Brawn and James S. Panek\*

Department of Chemistry and Center for Chemical Methodology and Library Development, Metcalf  
Center for Science and Engineering, 590 Commonwealth Avenue, Boston University, Boston,  
Massachusetts 02215

**$^1\text{H}$  and  $^{13}\text{C}$  NMR spectra for all new compounds:**

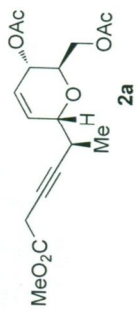

100 MHz, CDCl<sub>3</sub>

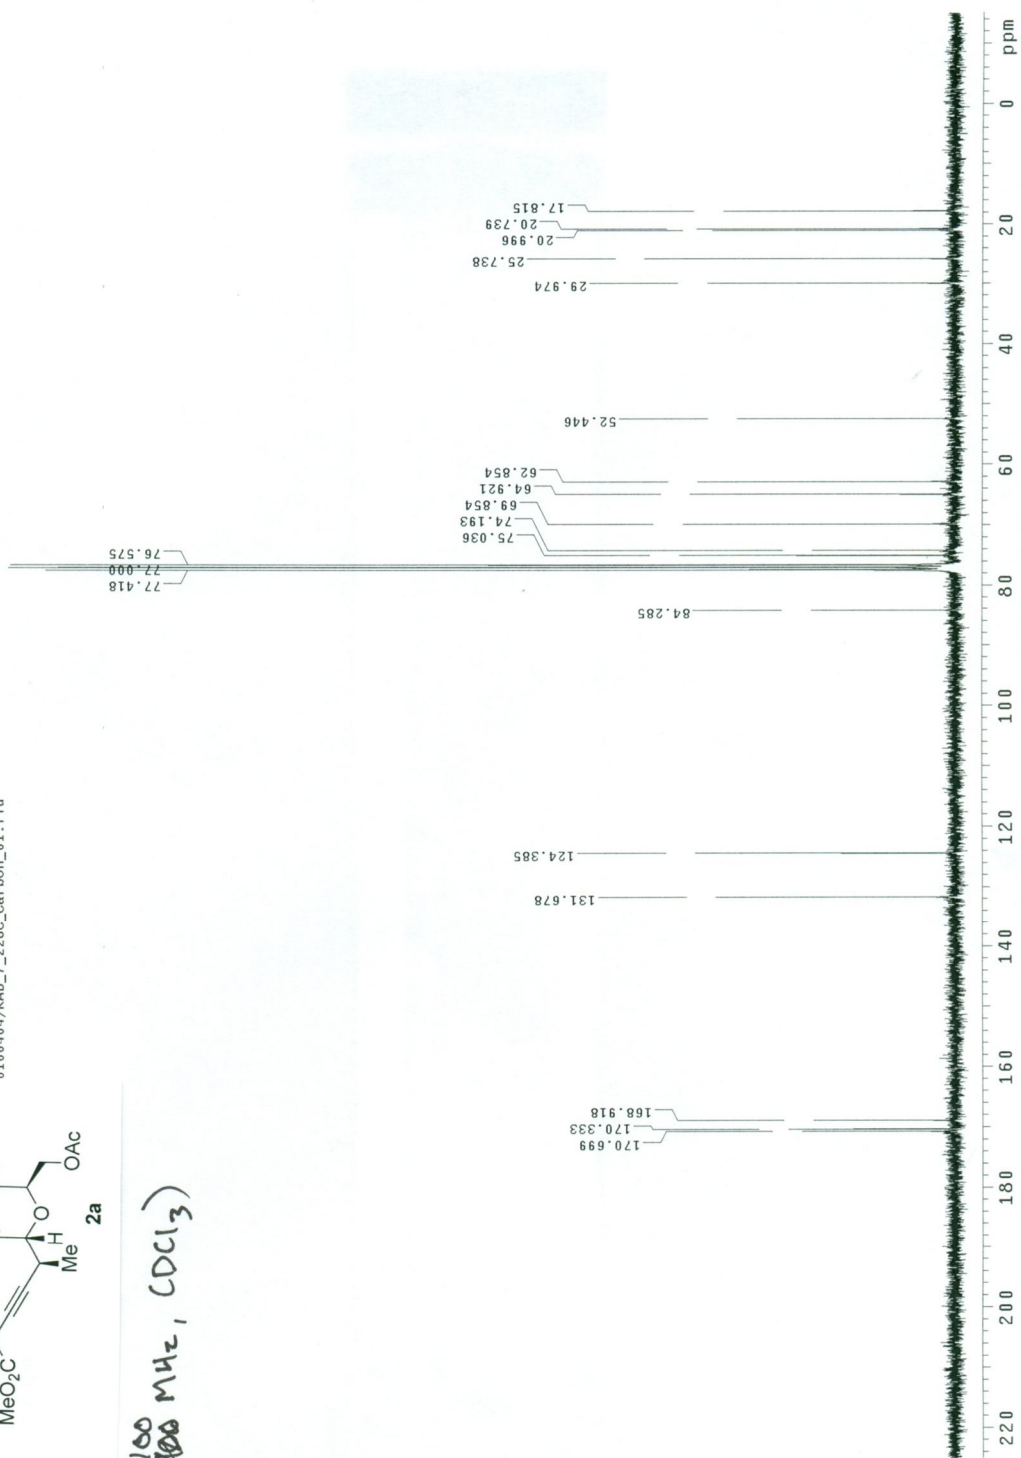

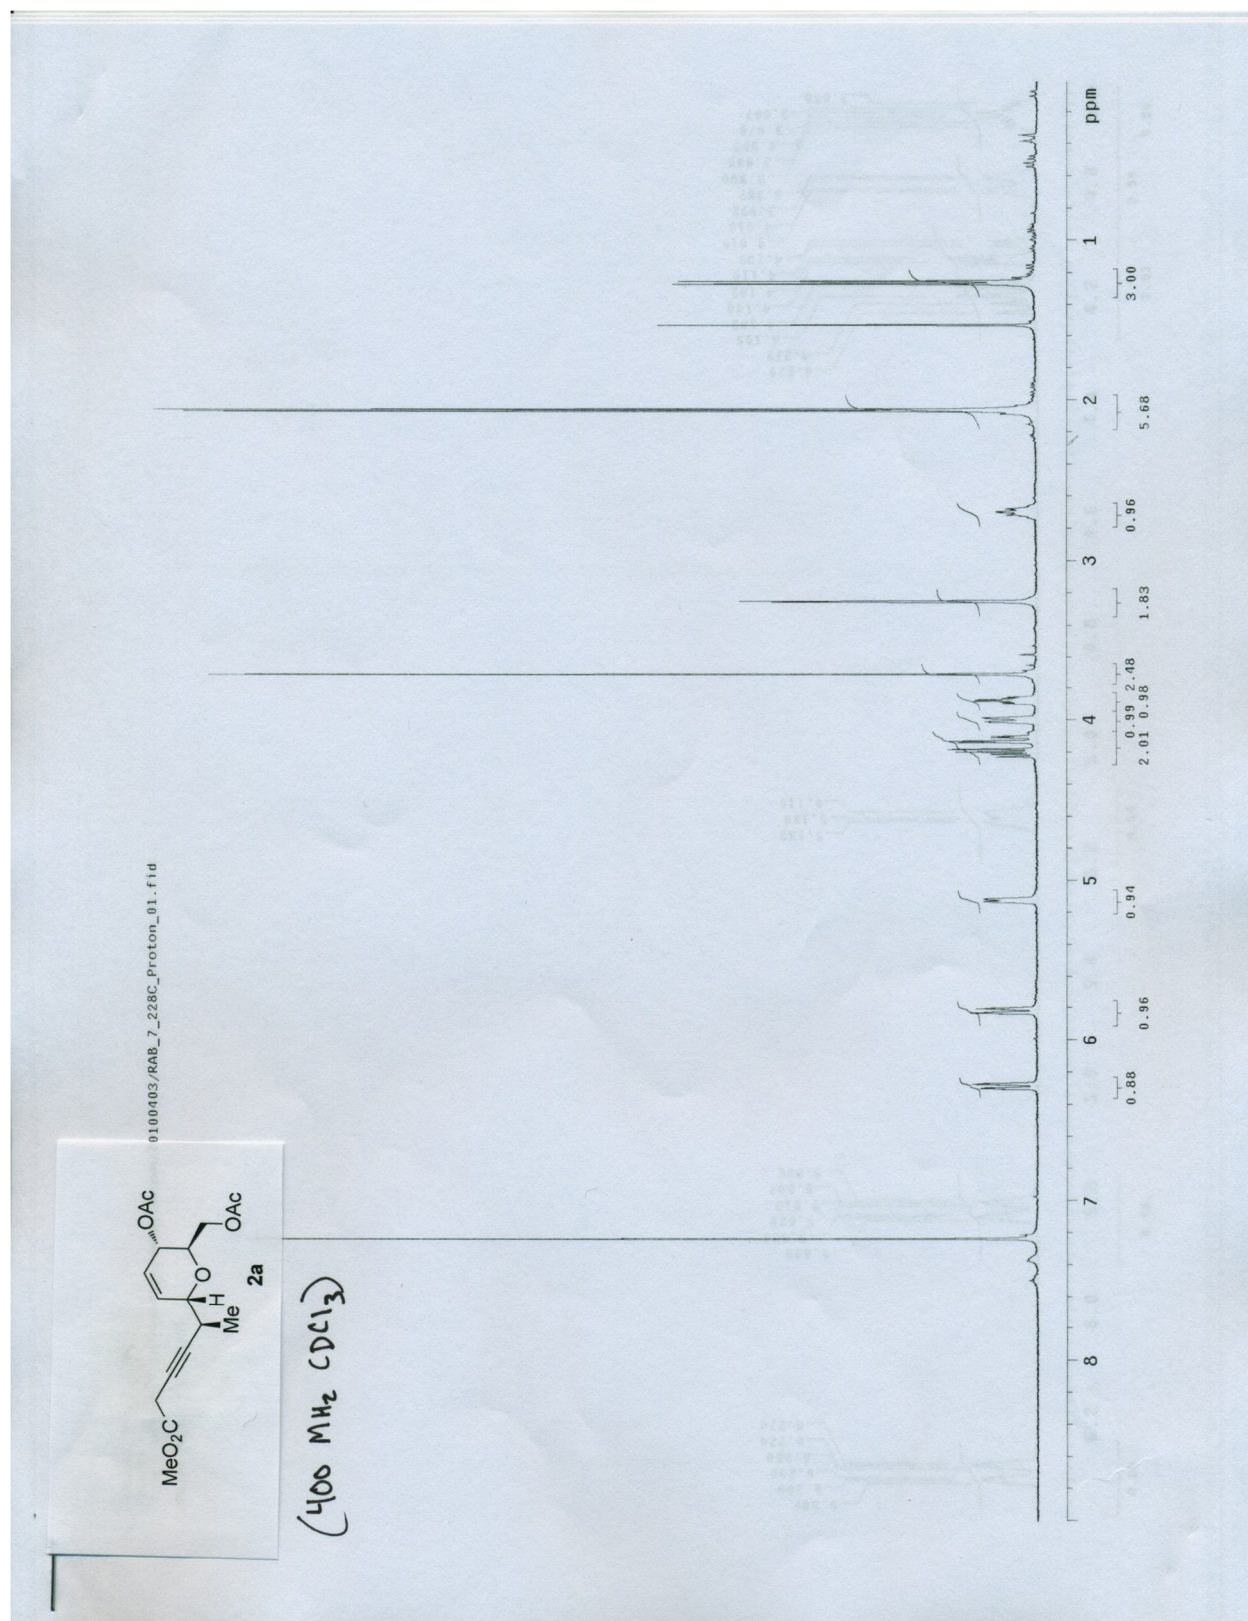

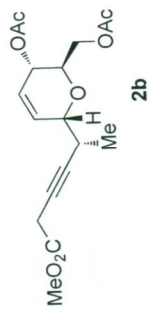

(100 MHz, CDCl<sub>3</sub>)

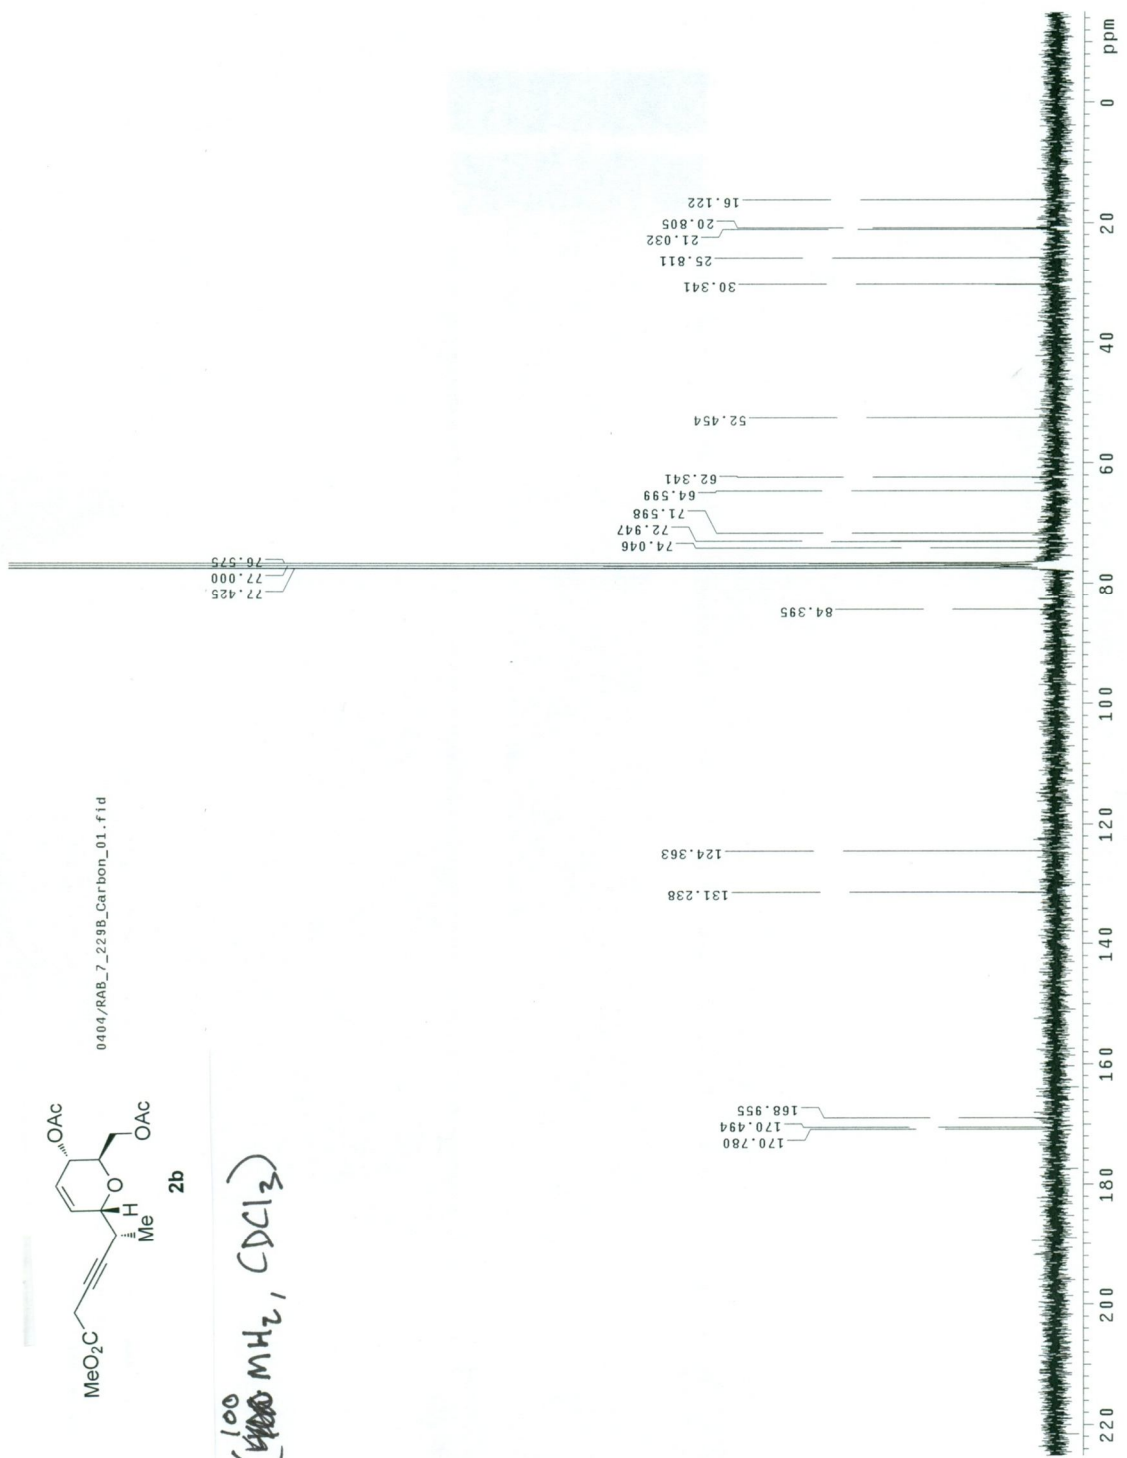



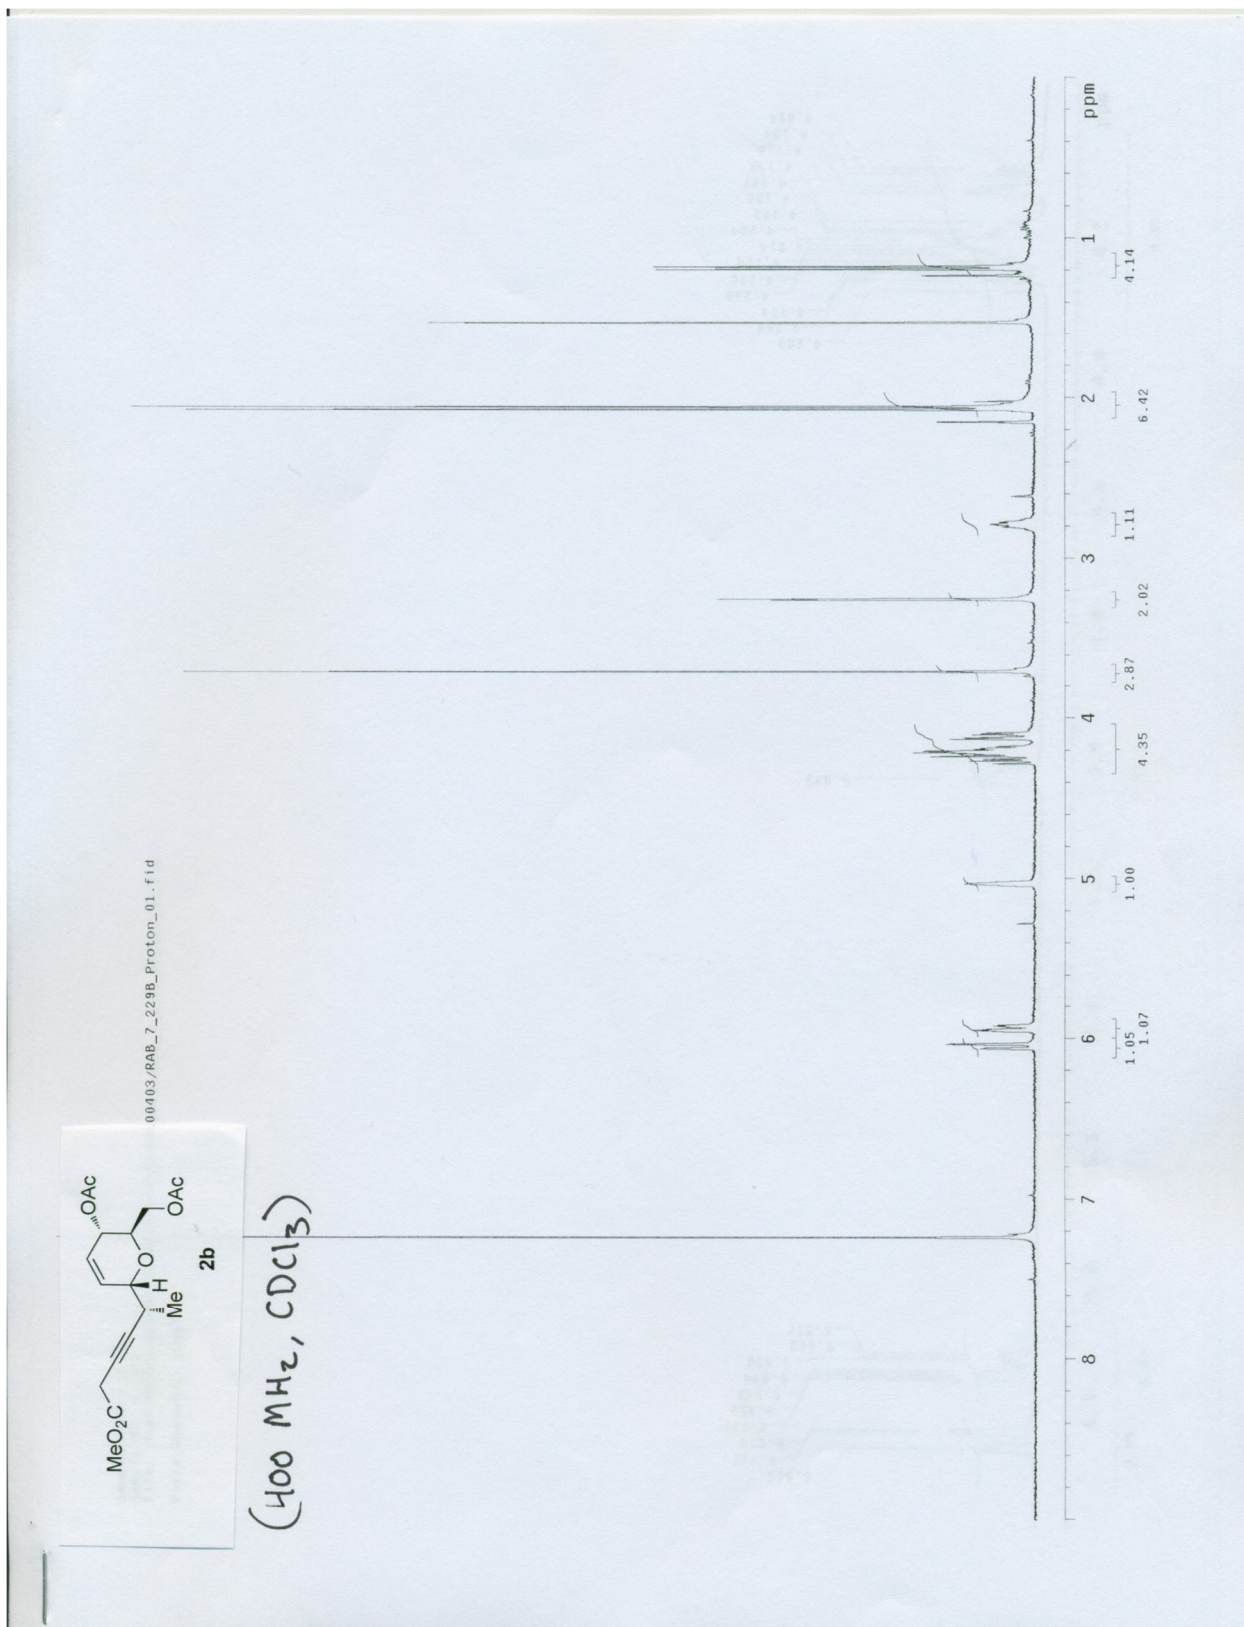

SI-13

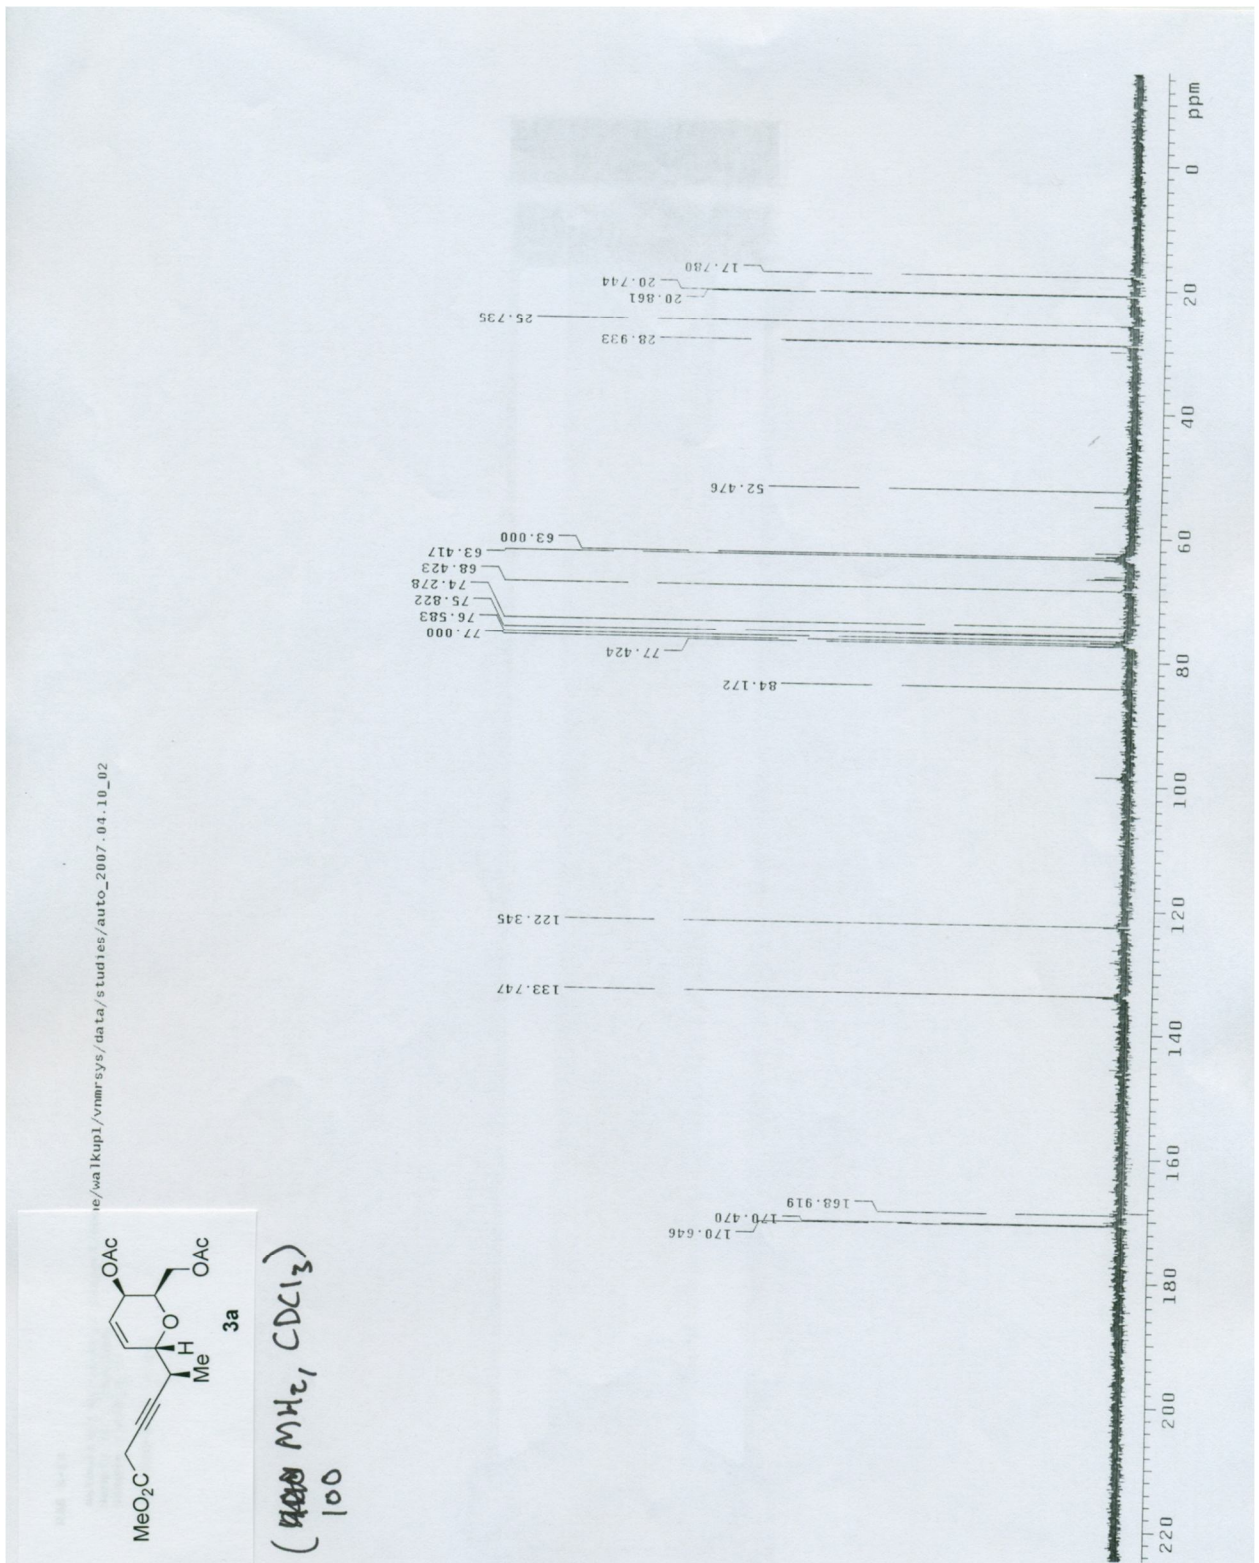



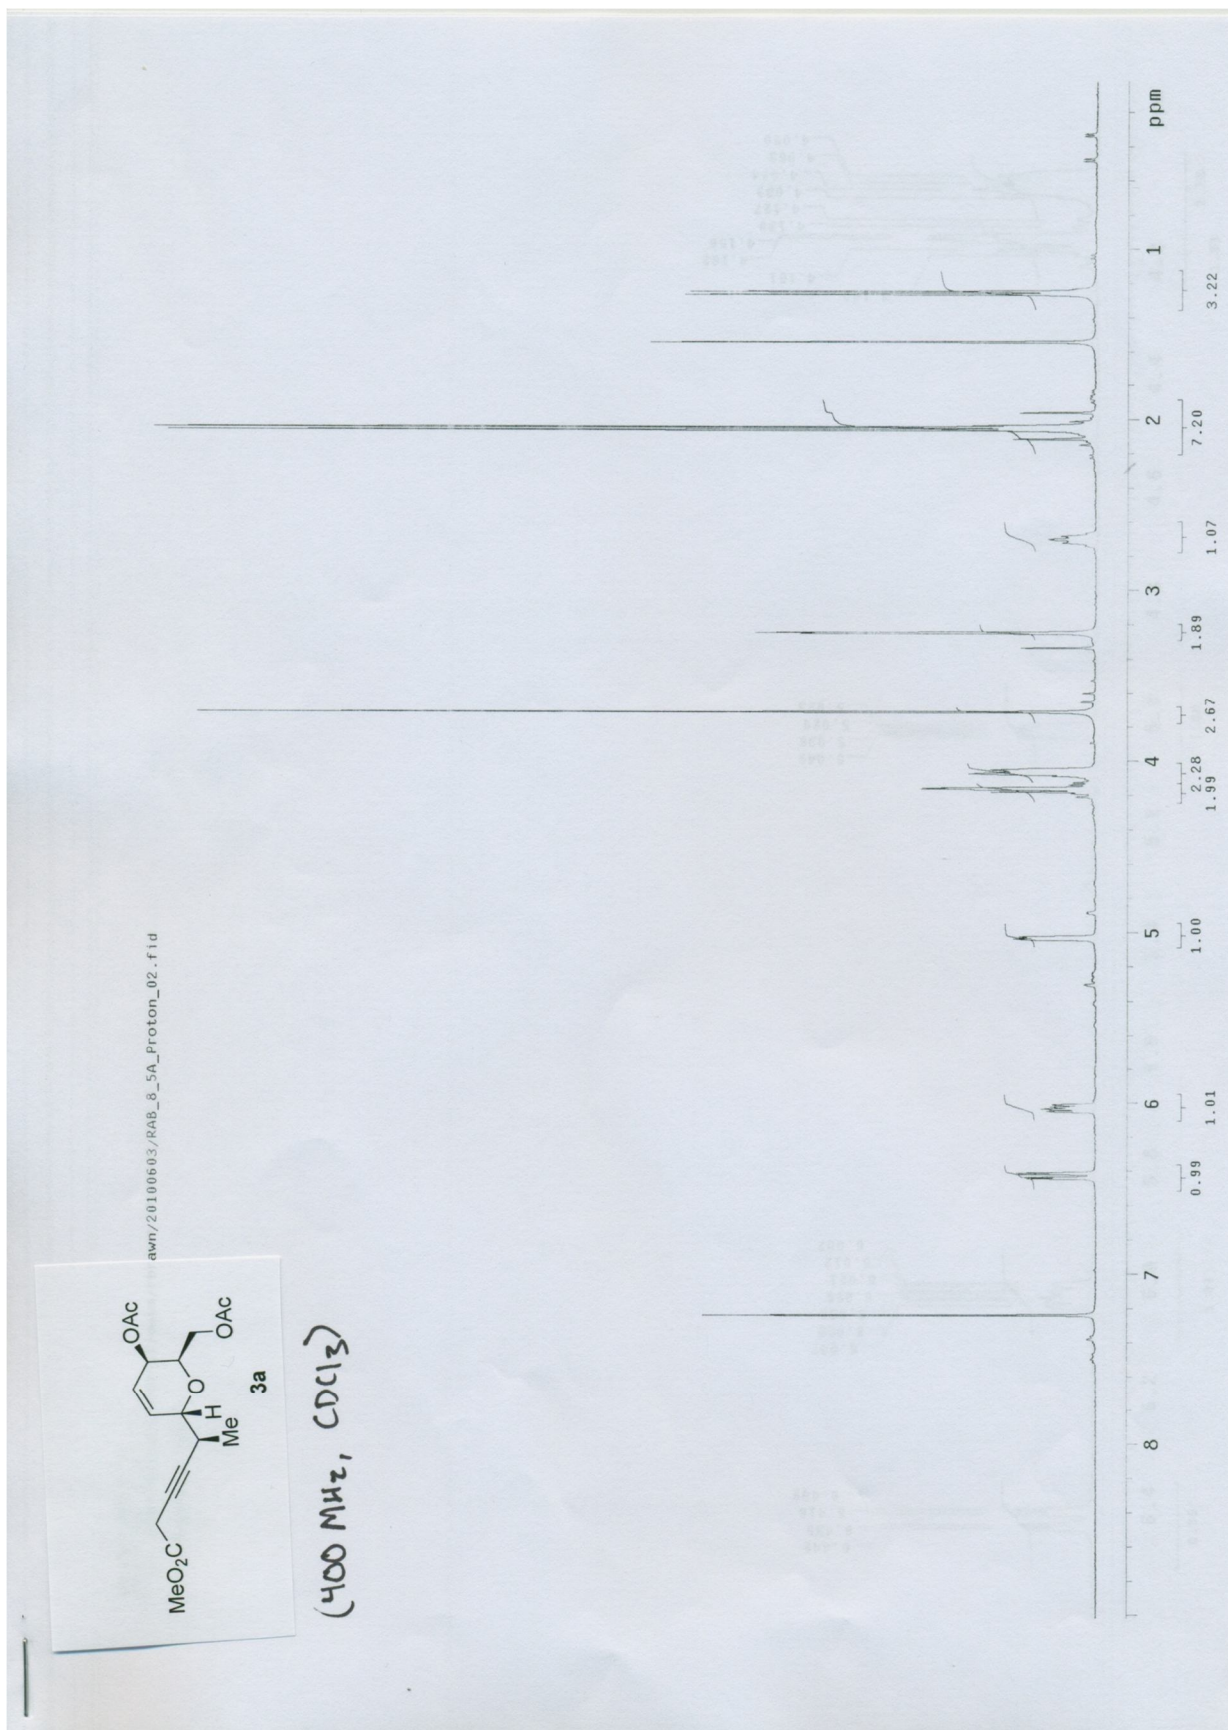

SI-15

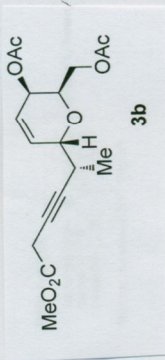

400 MHz, CDCl<sub>3</sub>

/wa1kupi/vnmrsys/data/studies/auto\_2007\_04\_10\_02

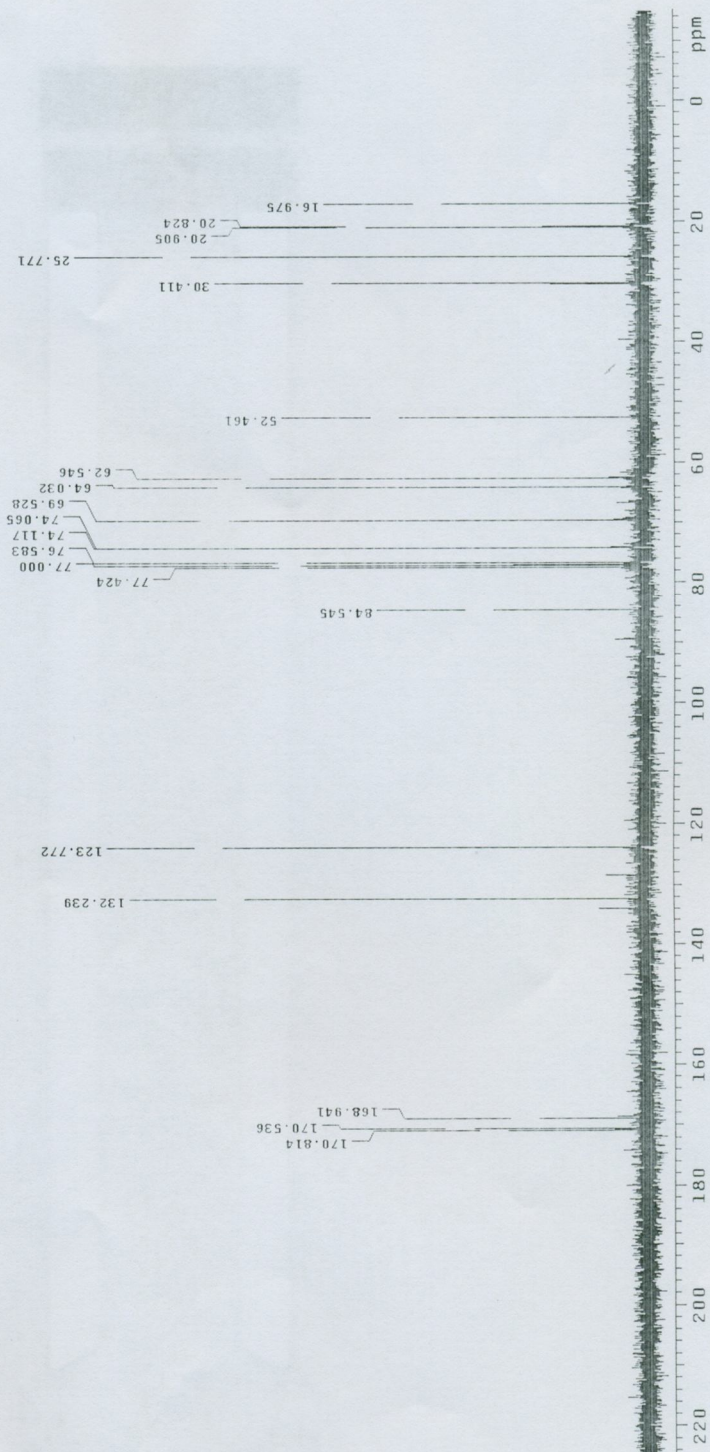



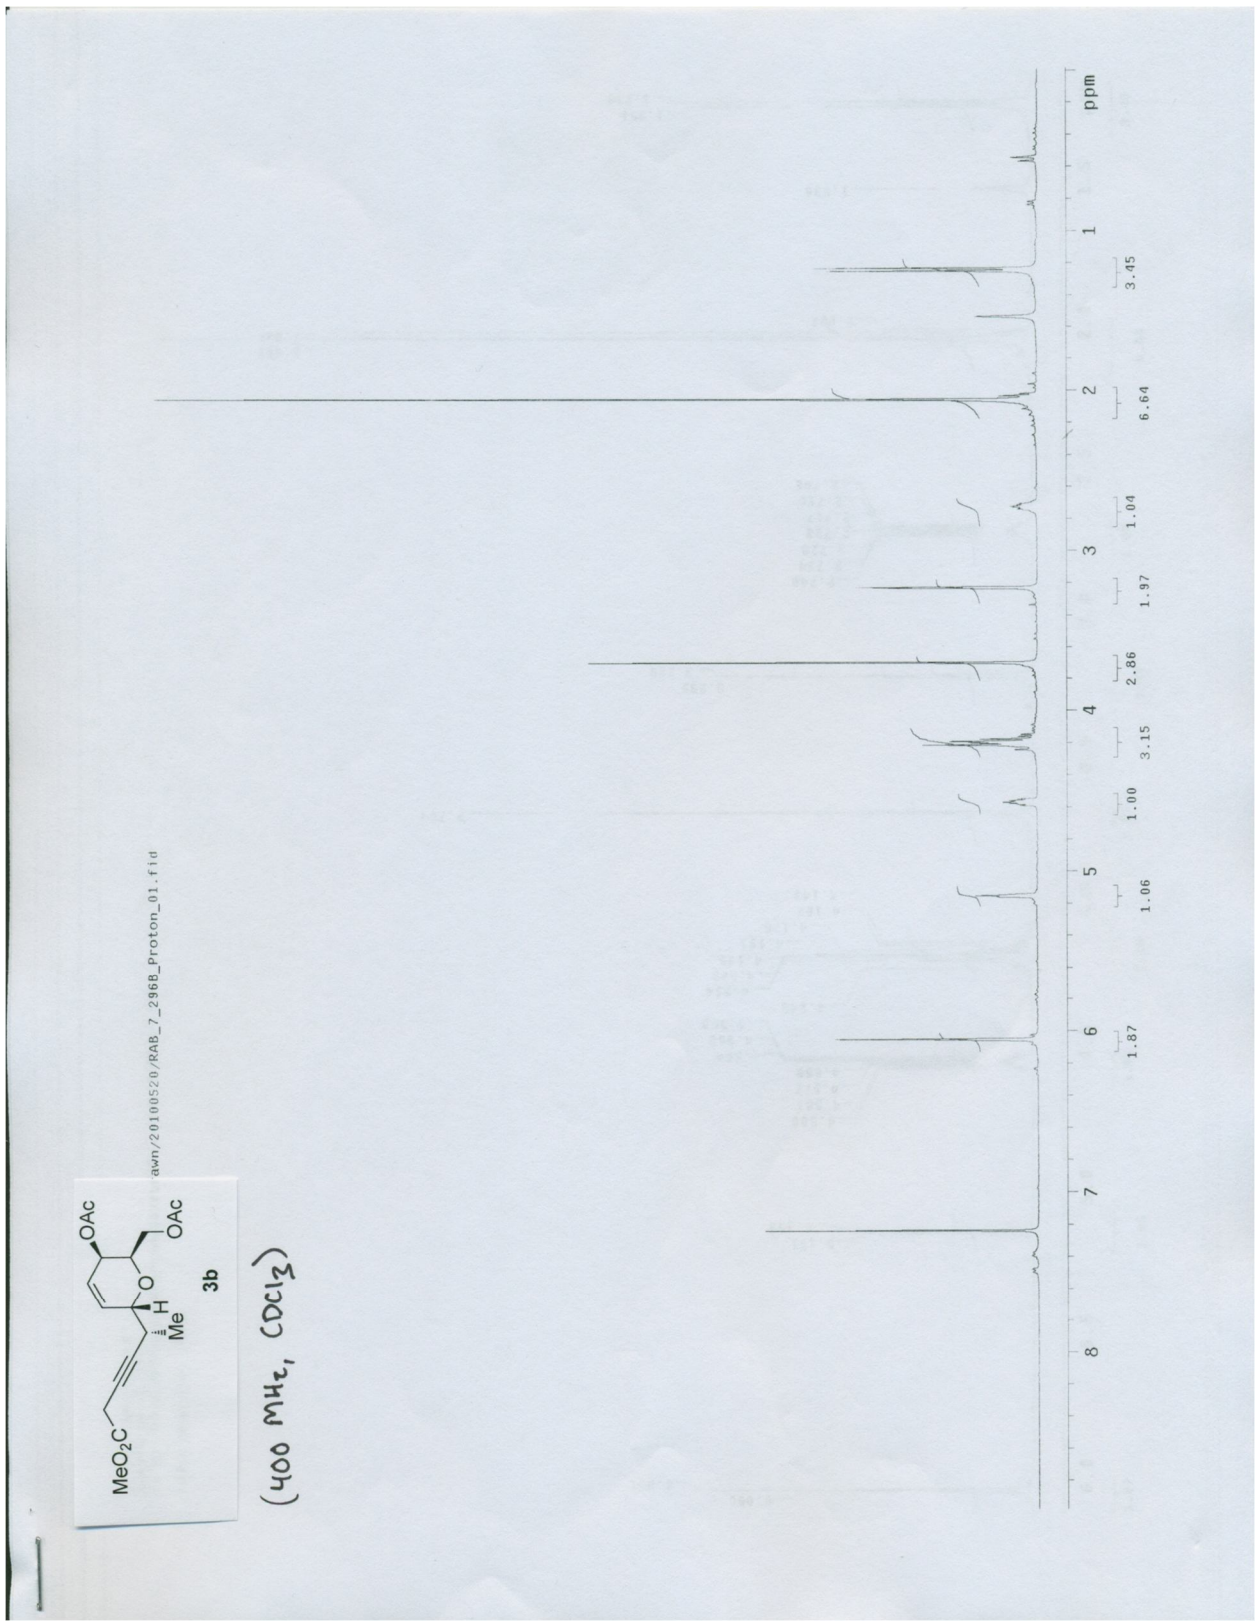

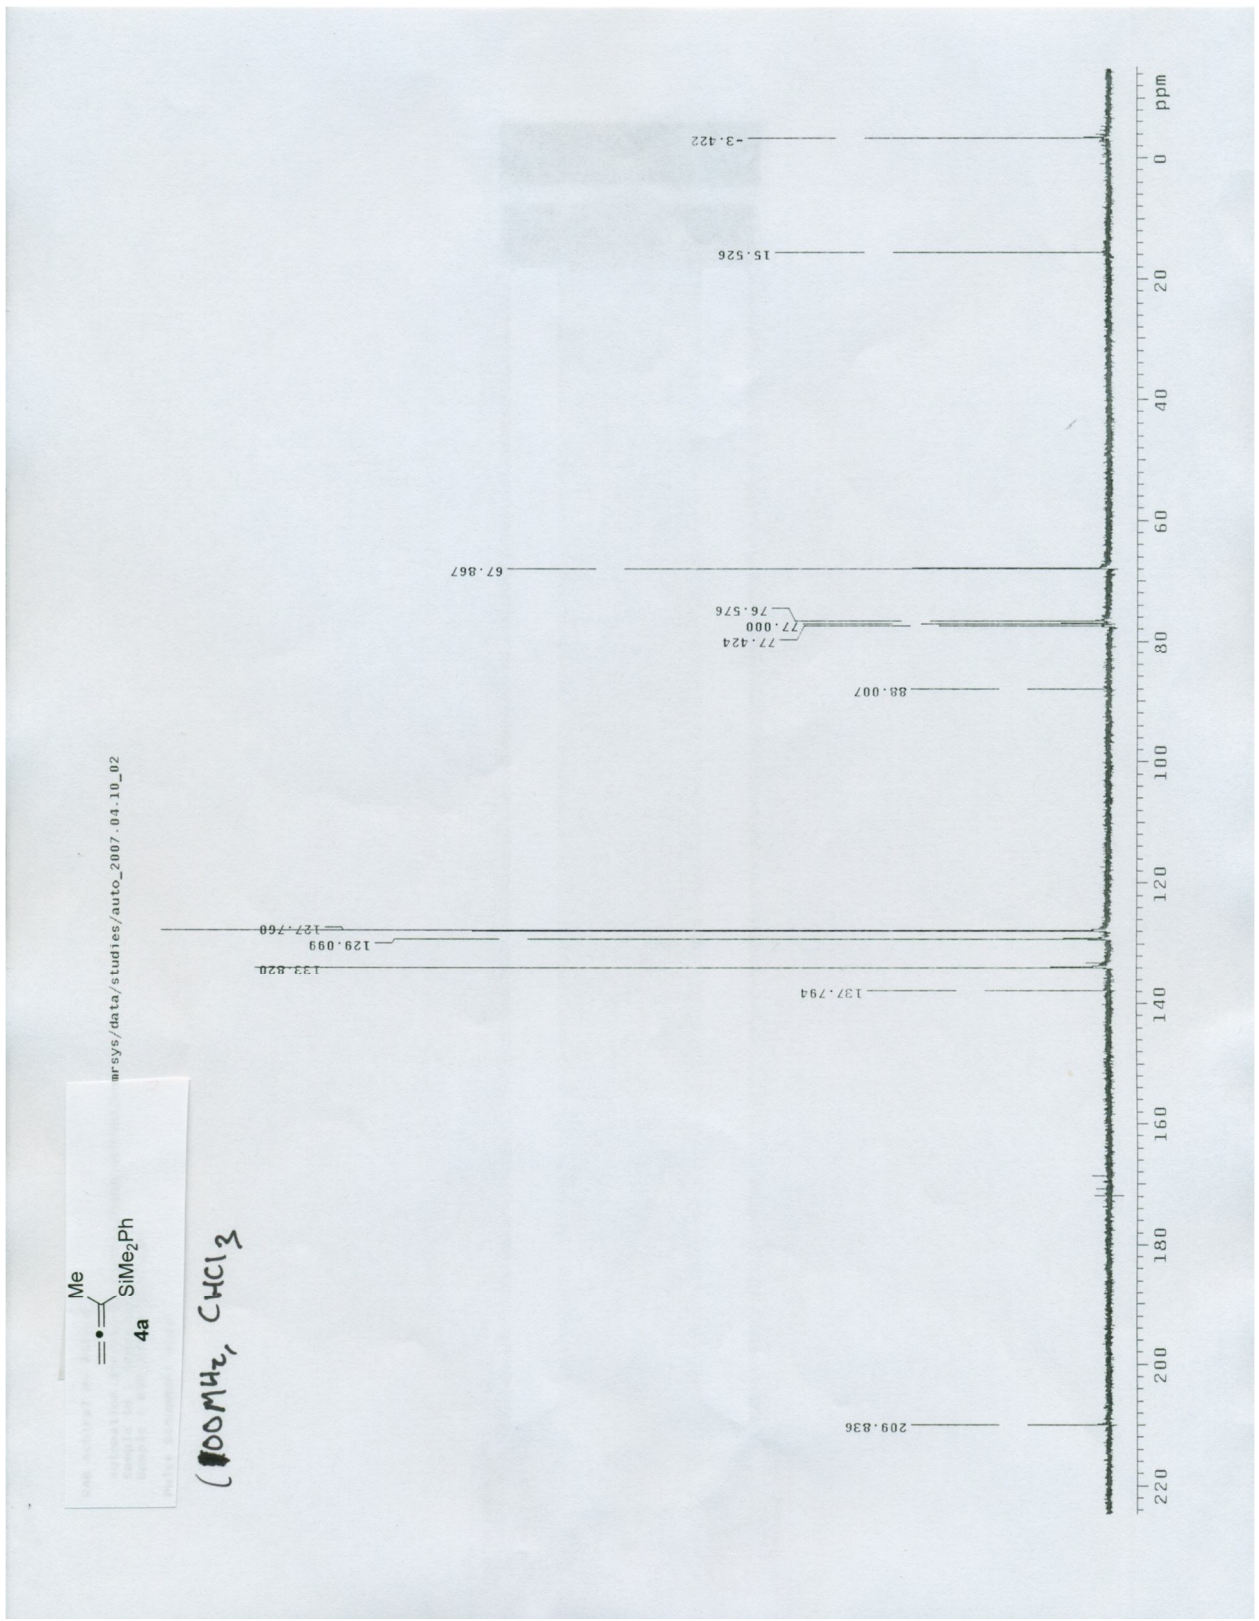



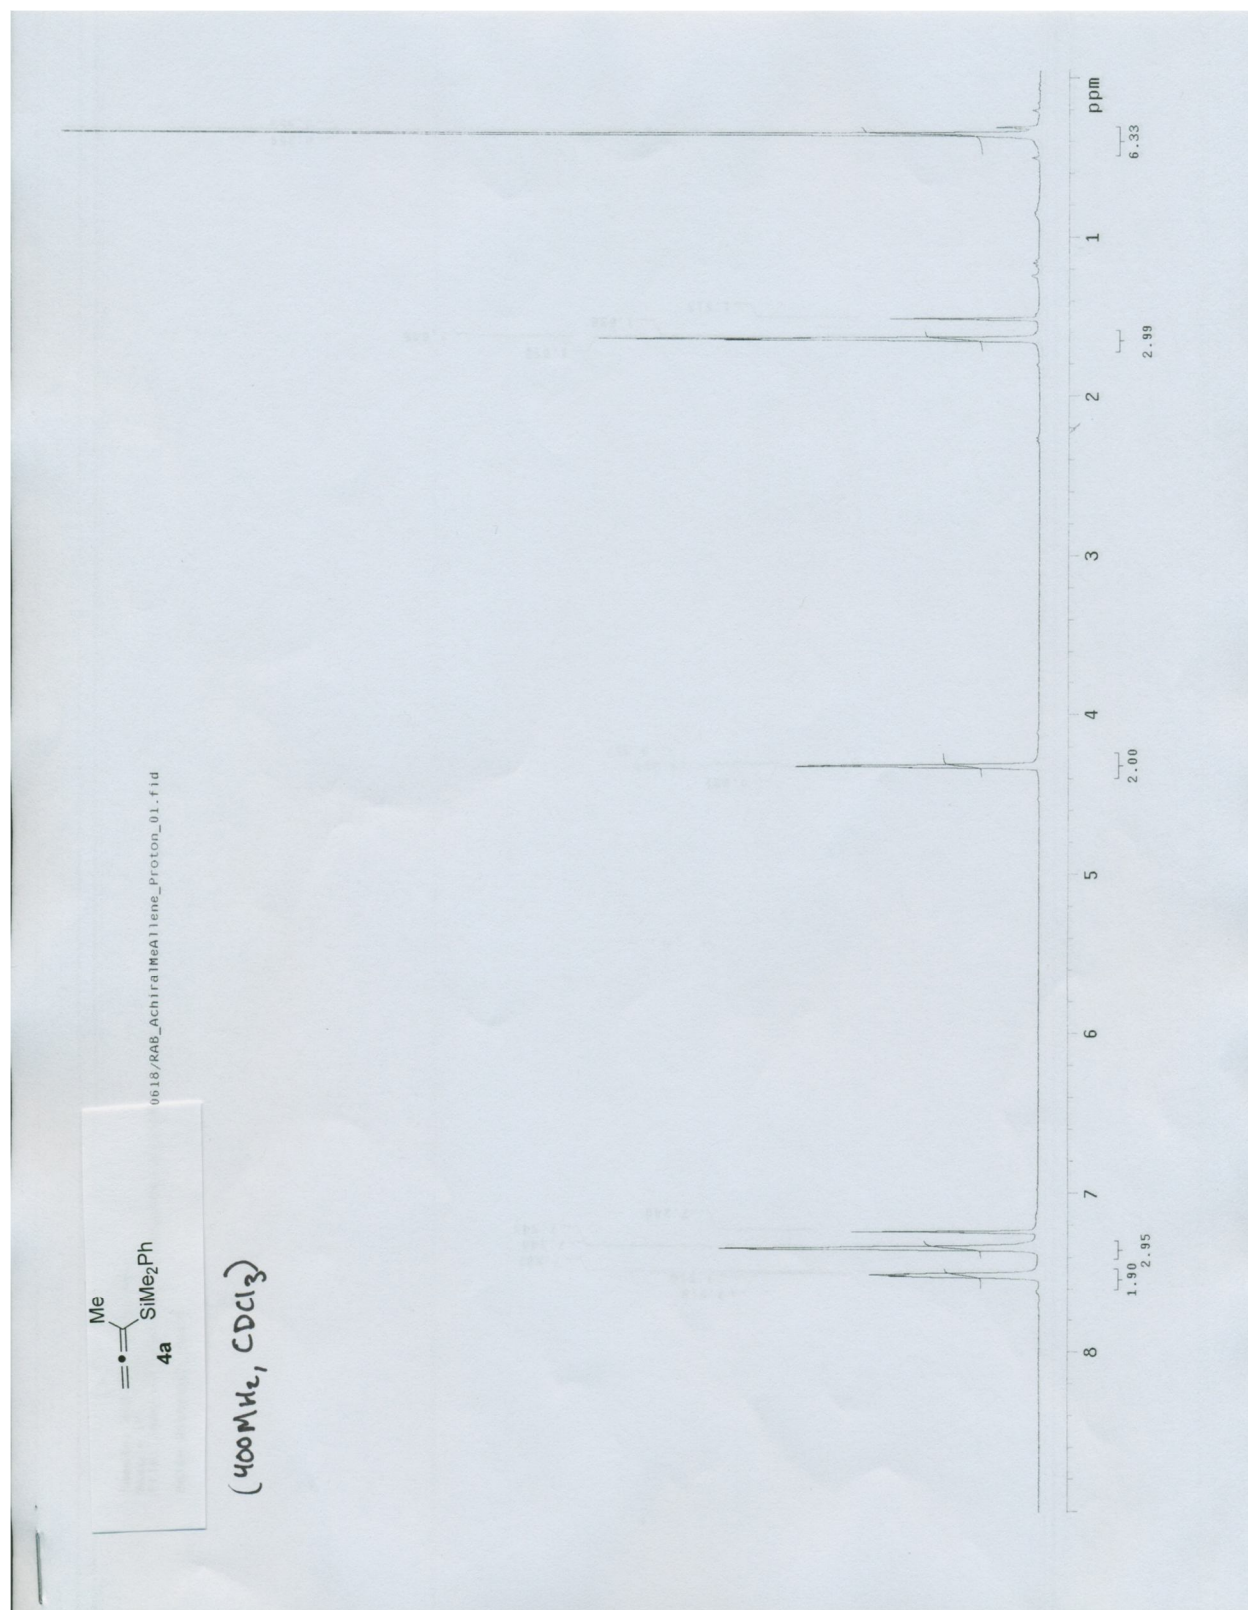



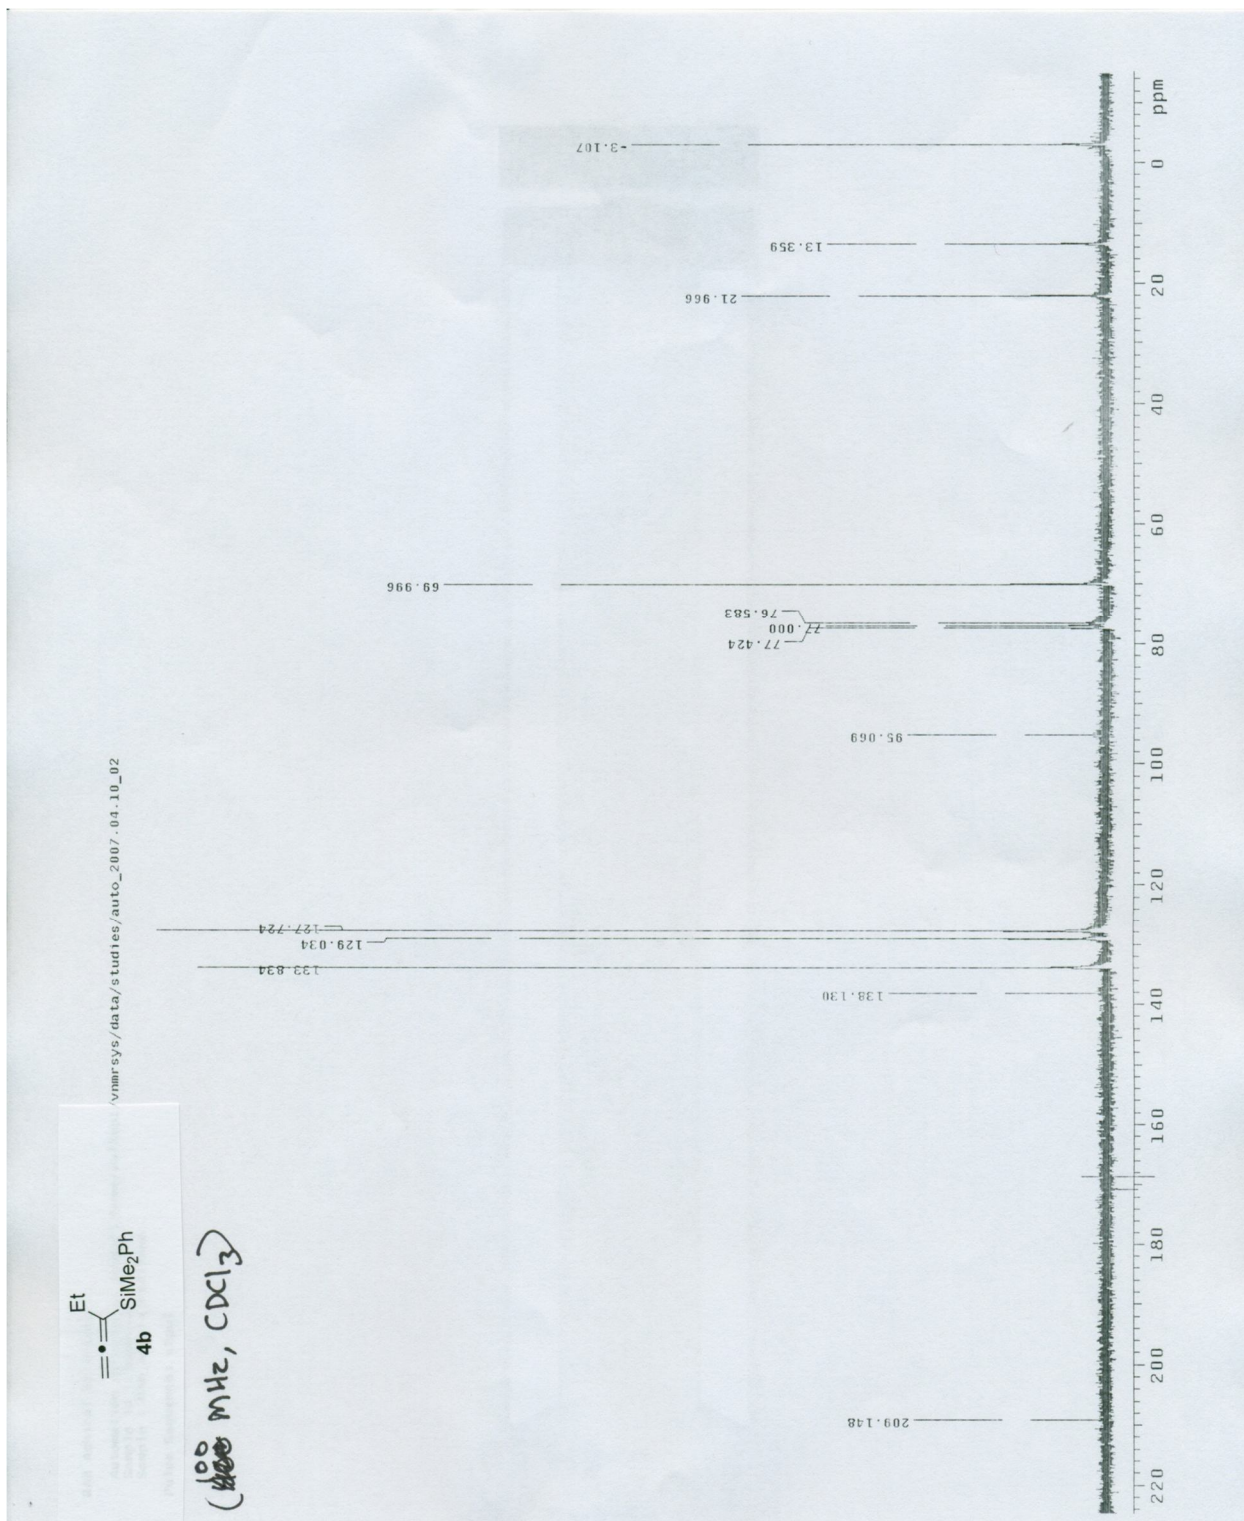

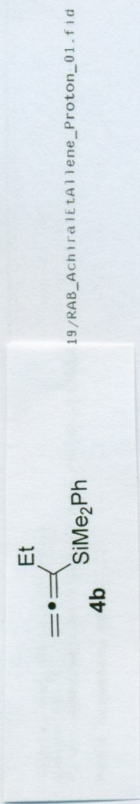

(400 MHz, CDCl<sub>3</sub>)

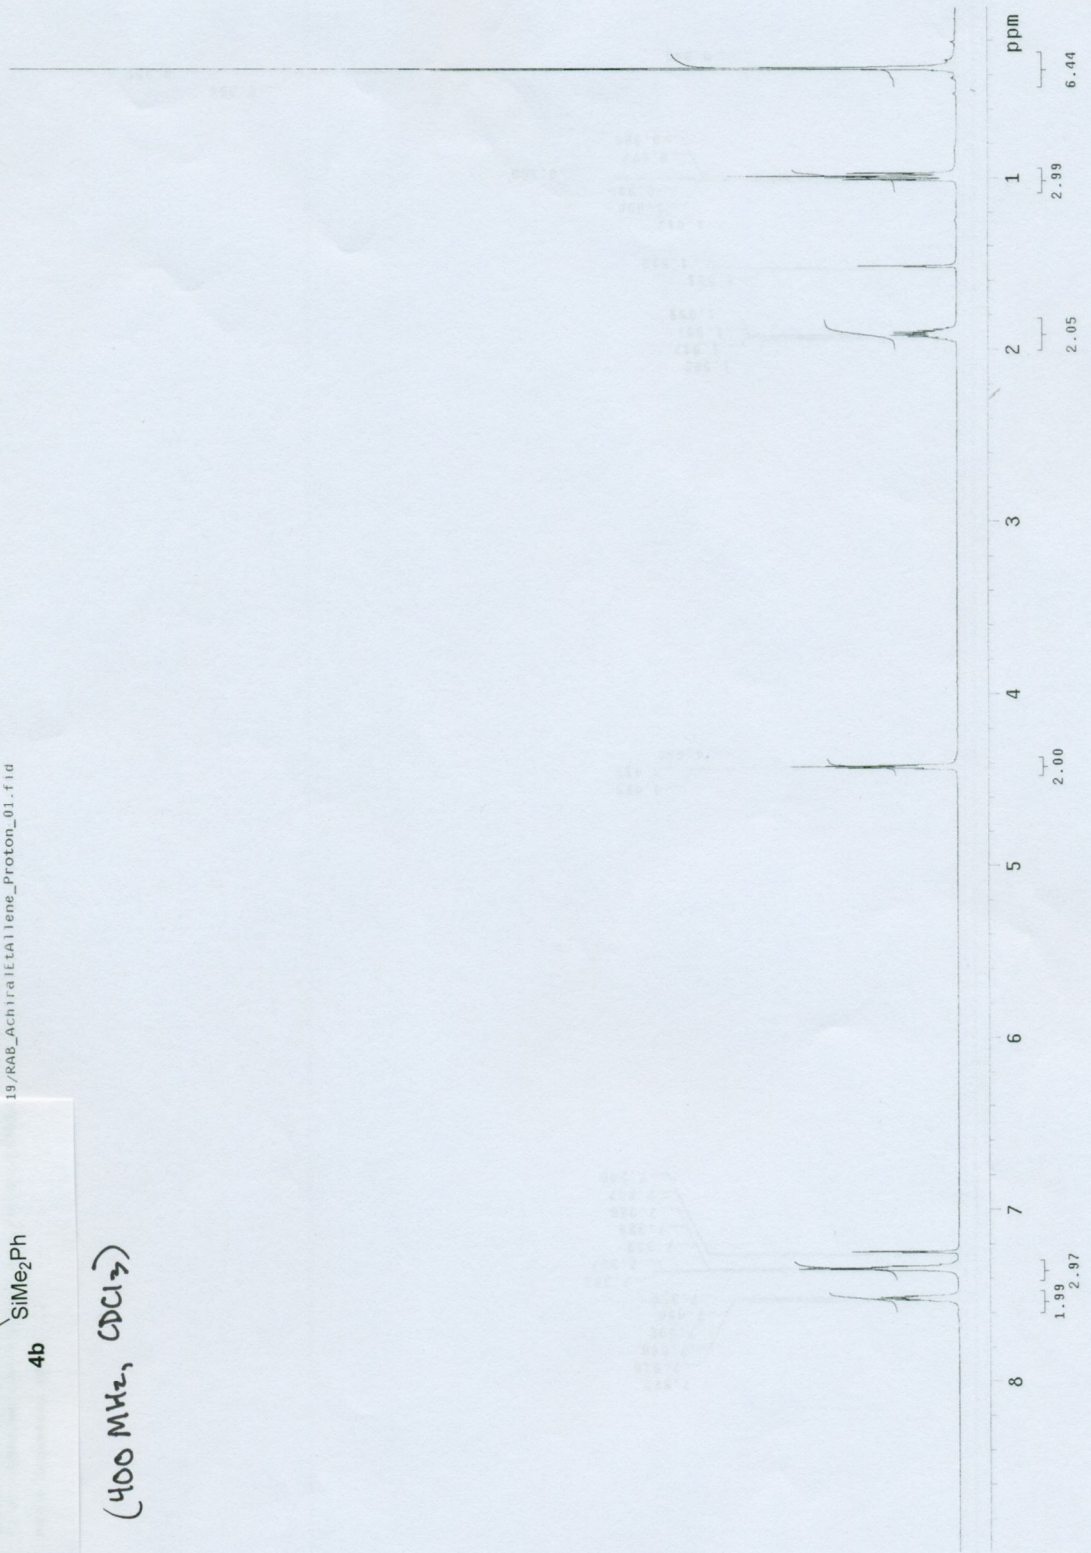



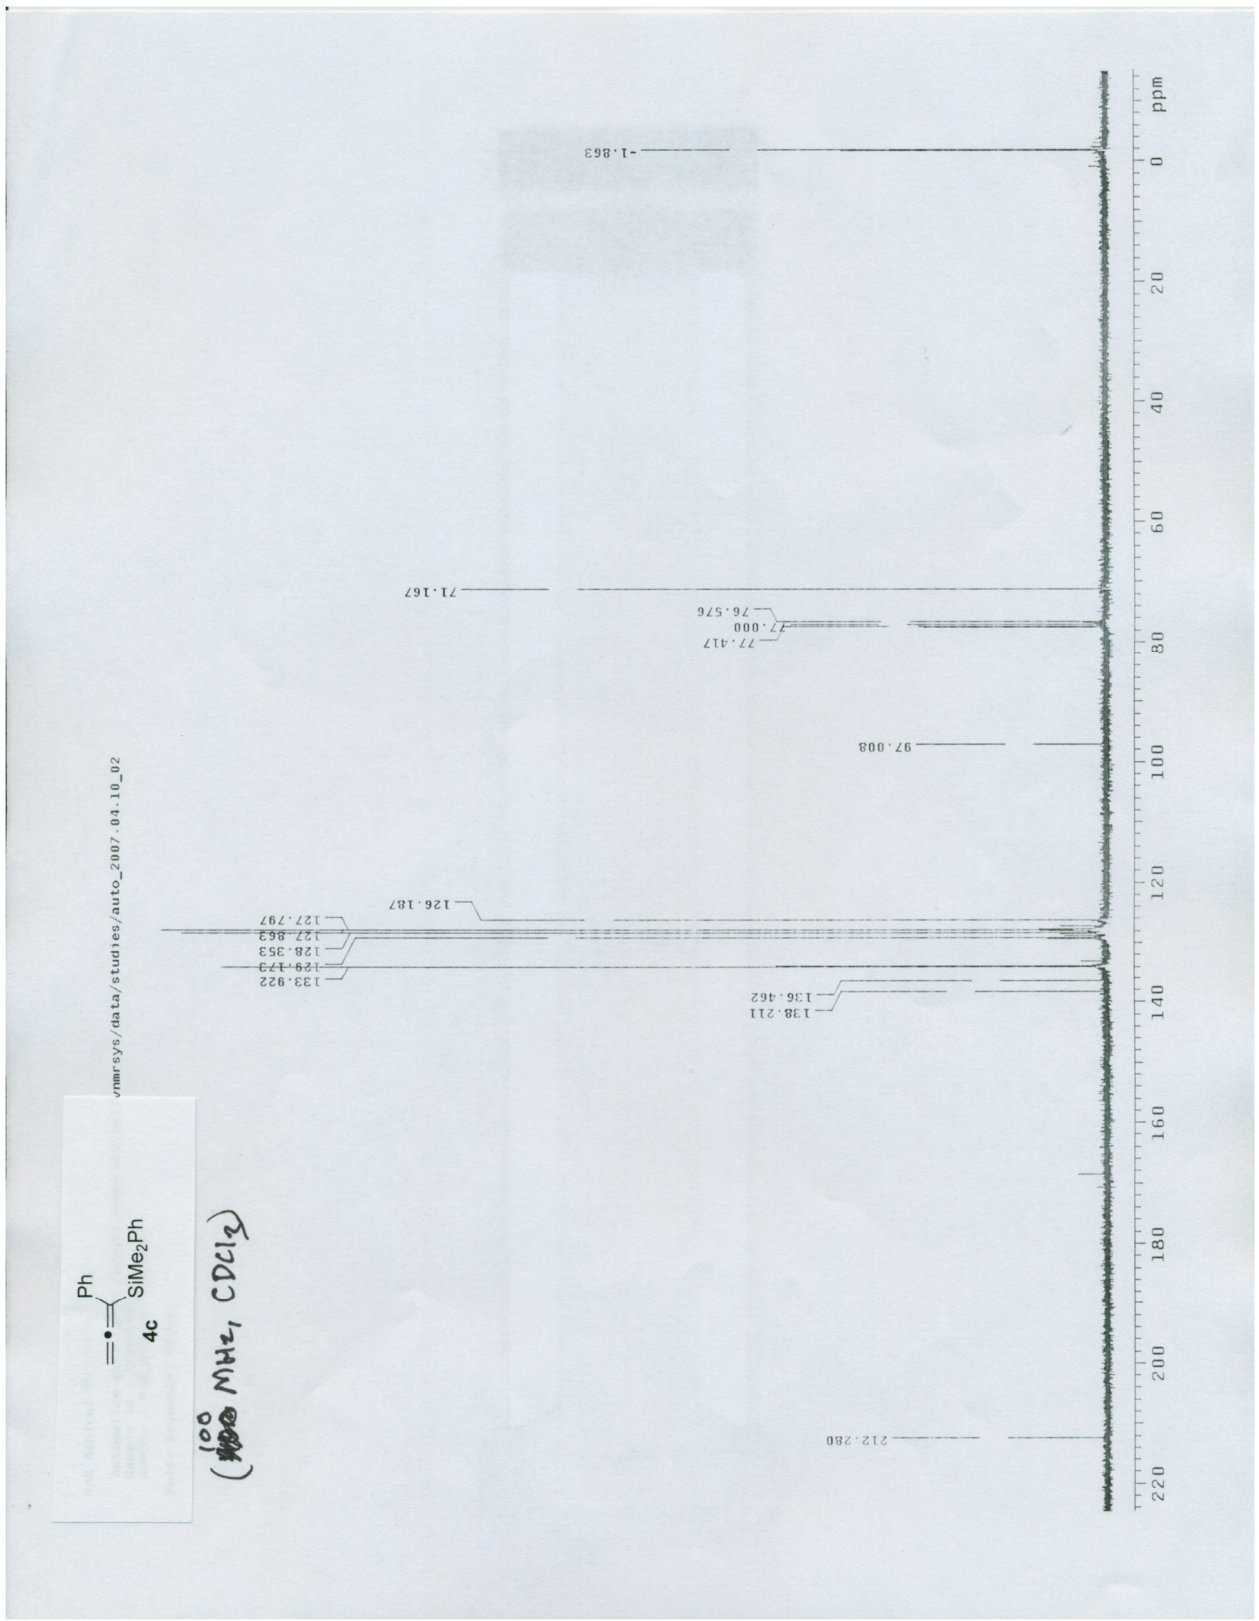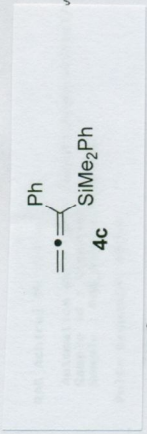

(100 MHz, CDCl<sub>3</sub>)



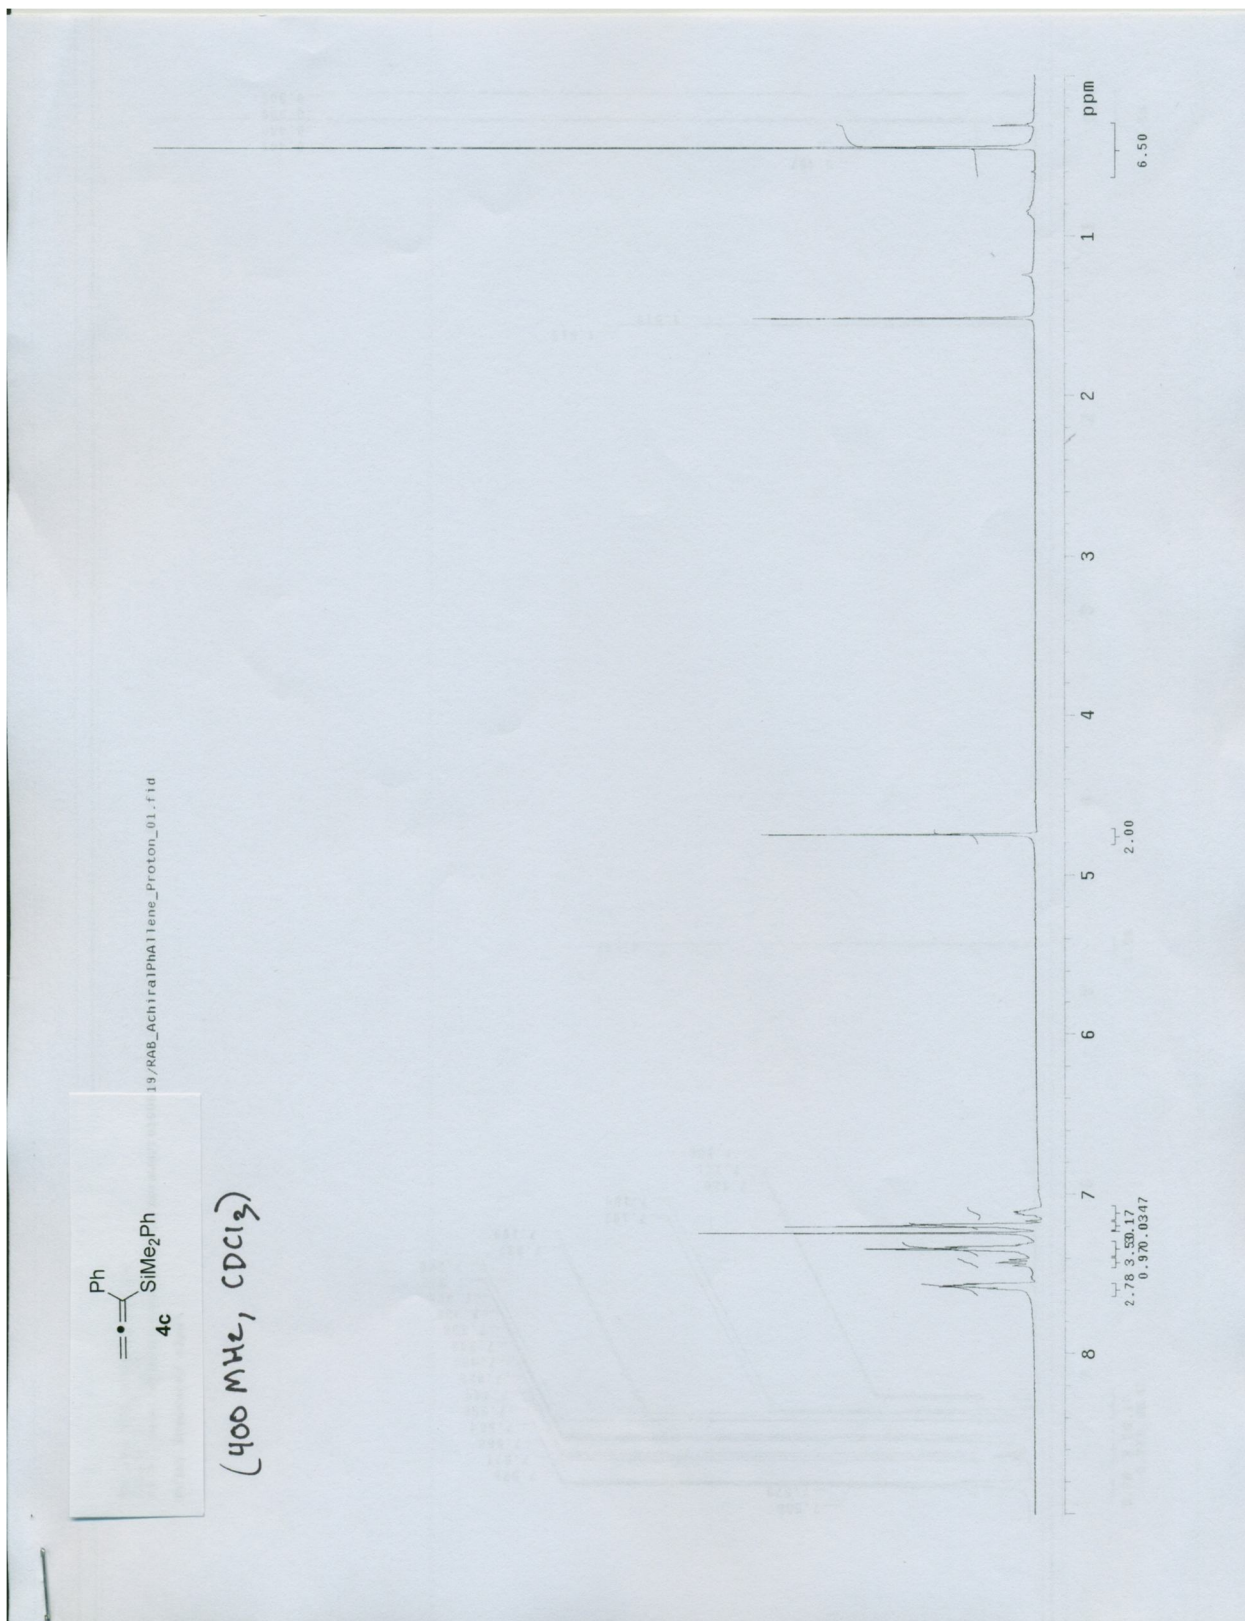

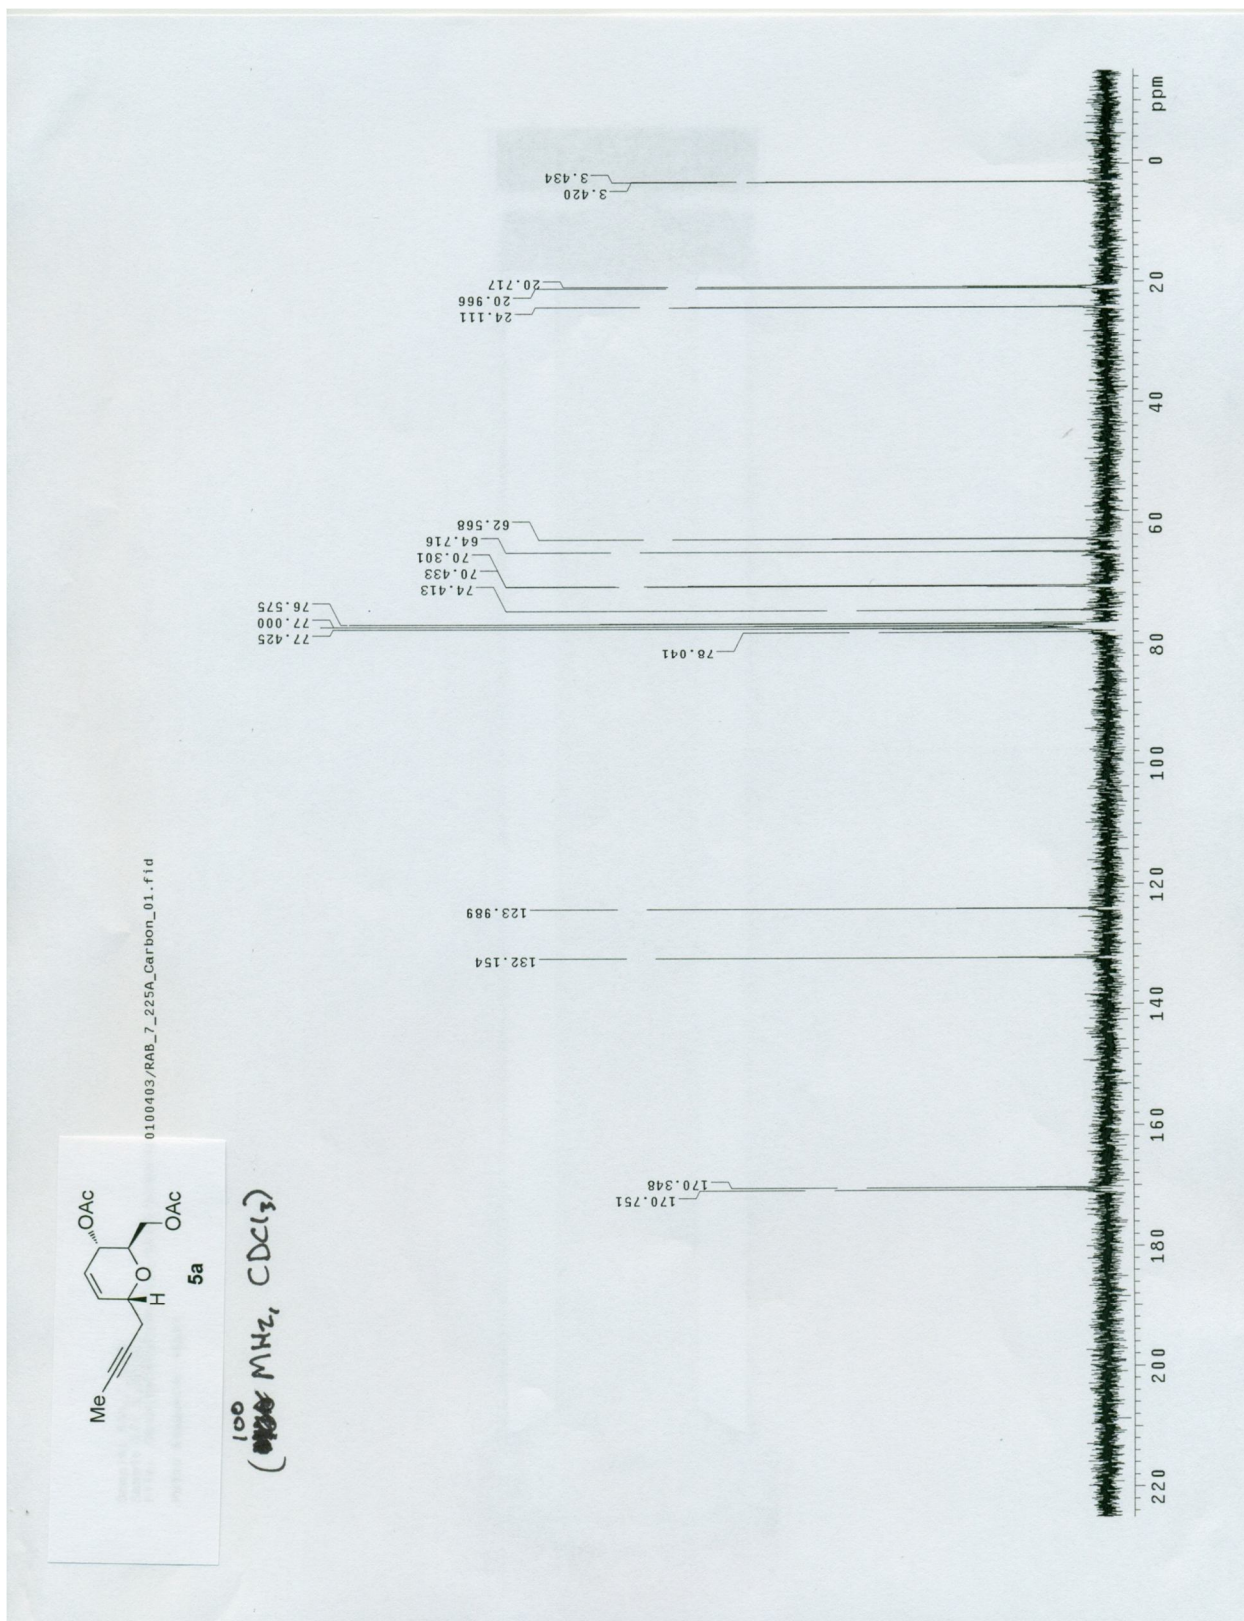

SI-24



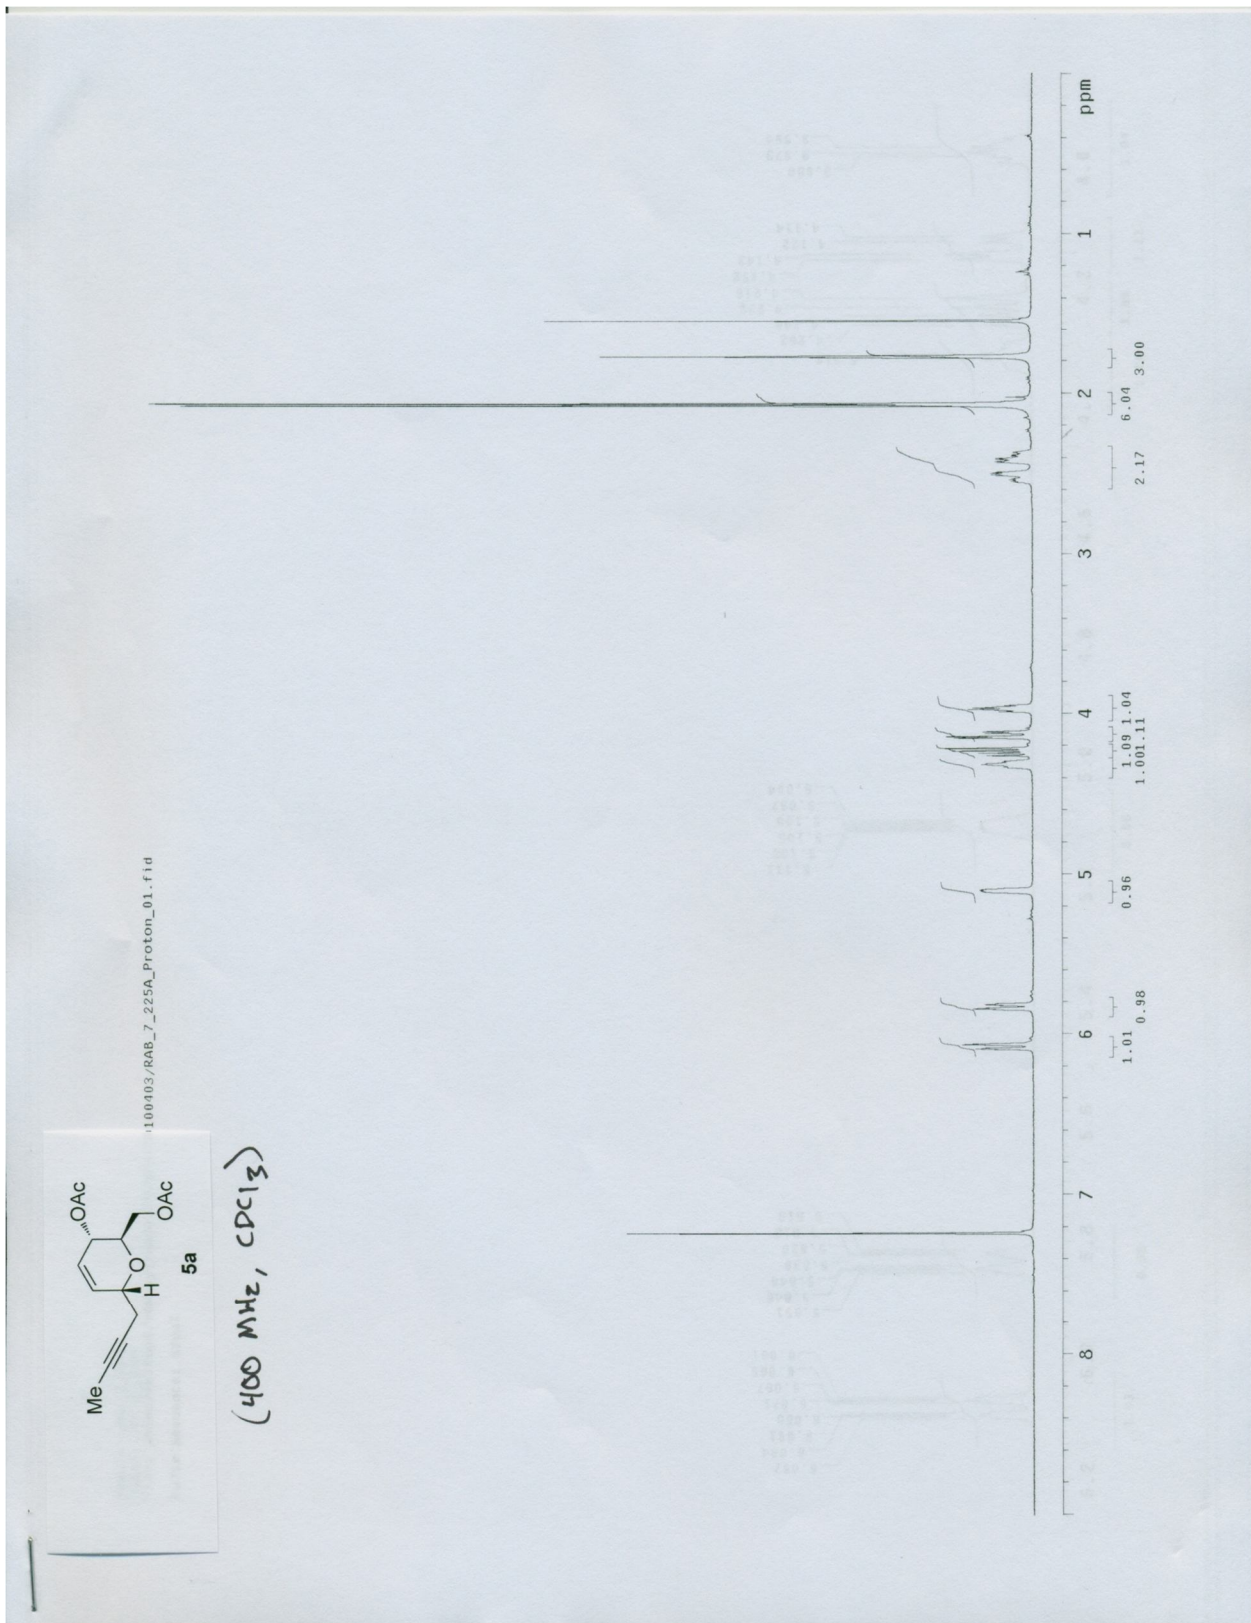



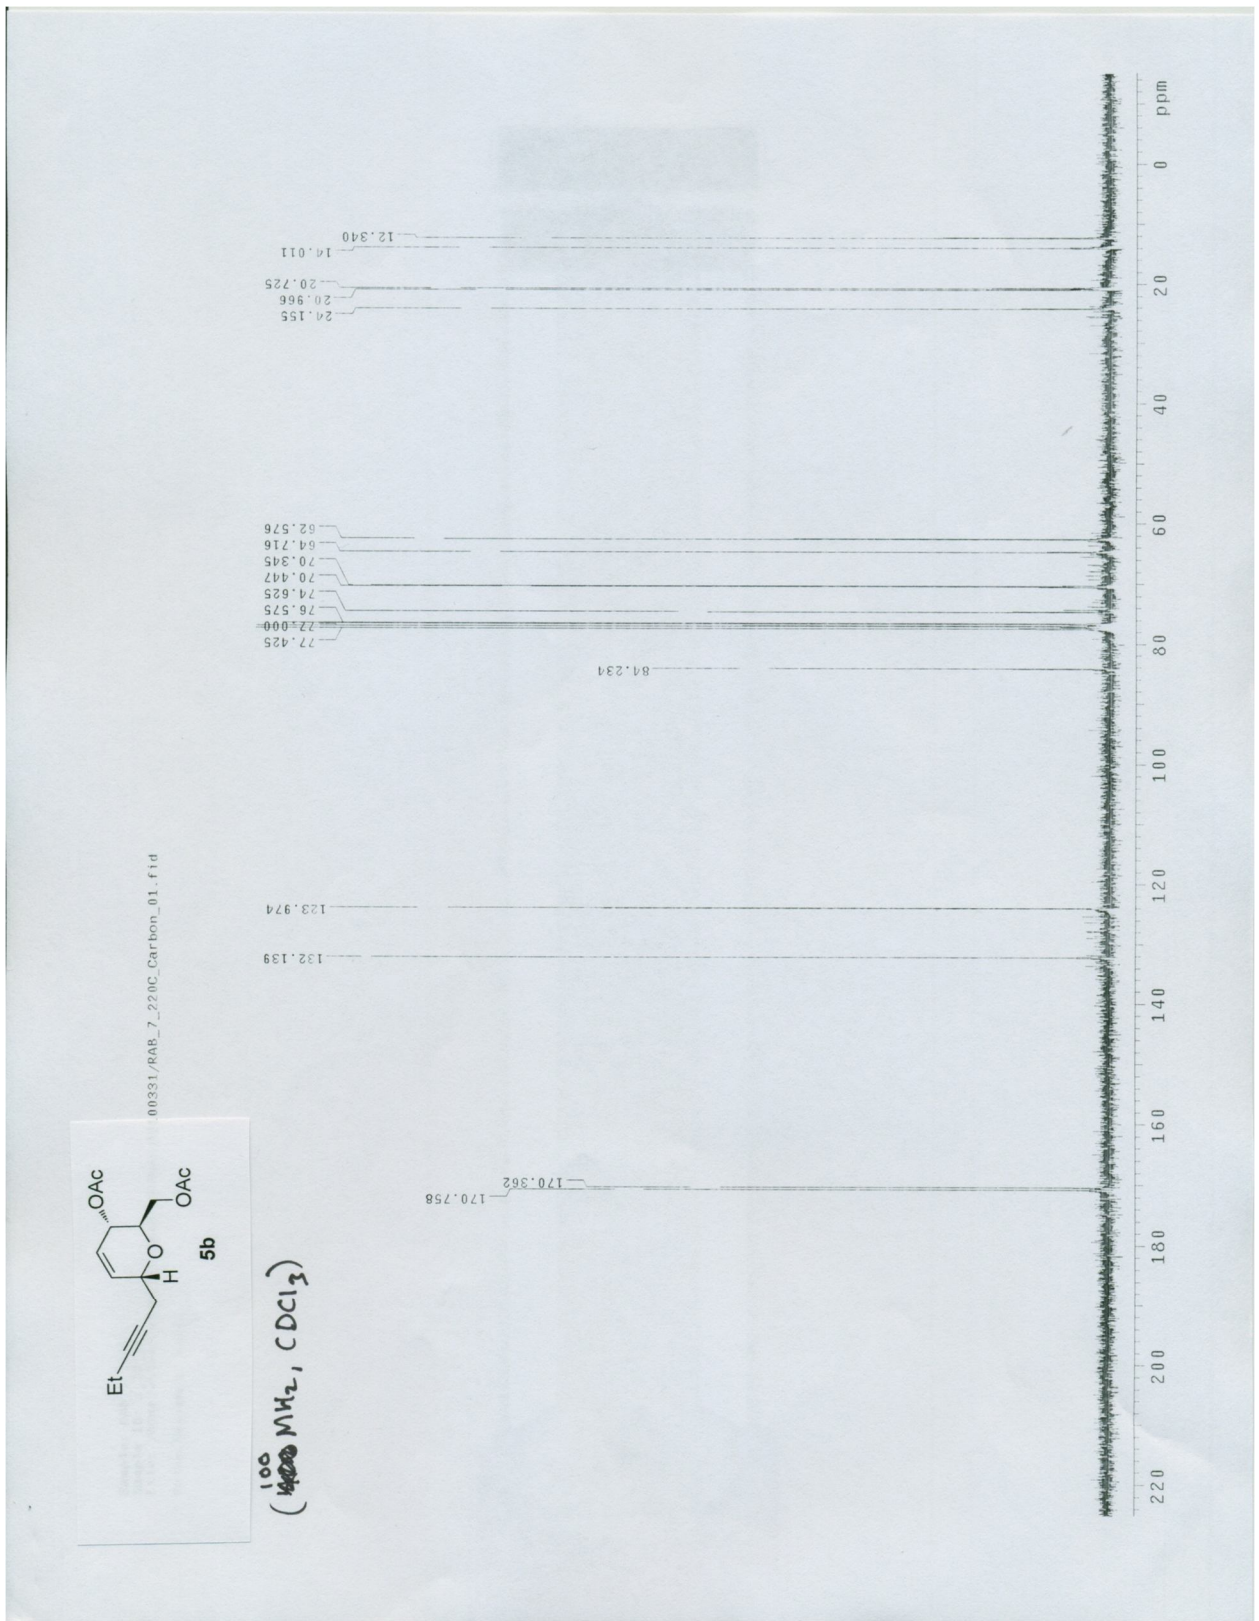

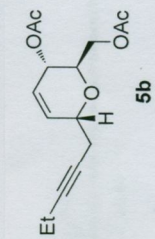

327/RAB\_7\_220C\_Proton\_01.fid

(400 MHz, CDCl<sub>3</sub>)

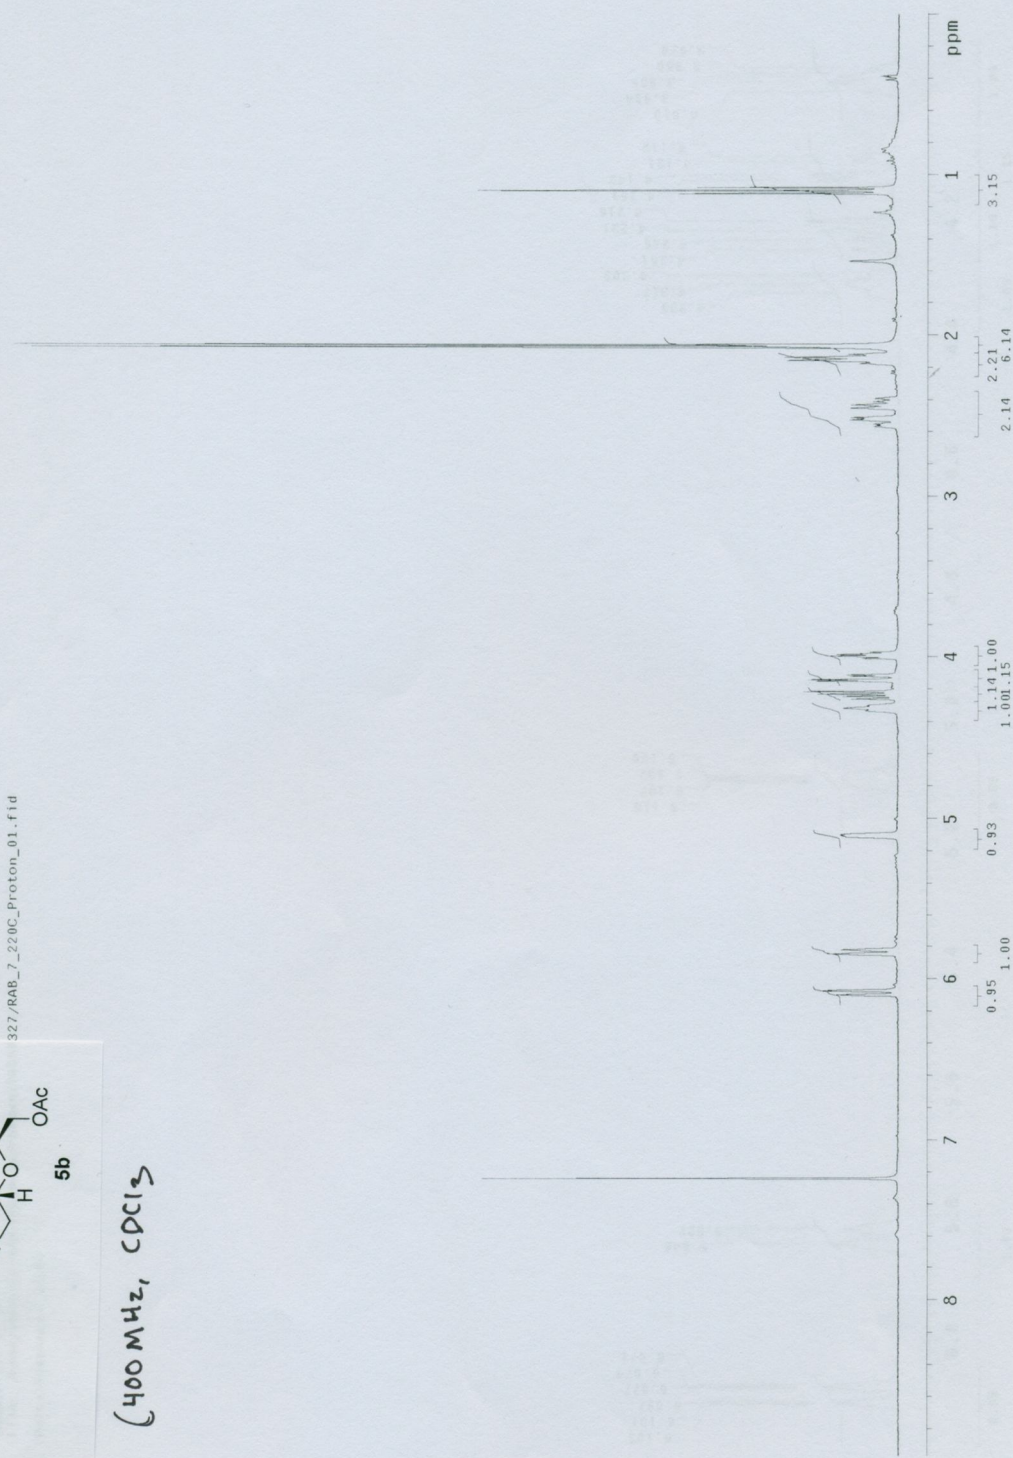

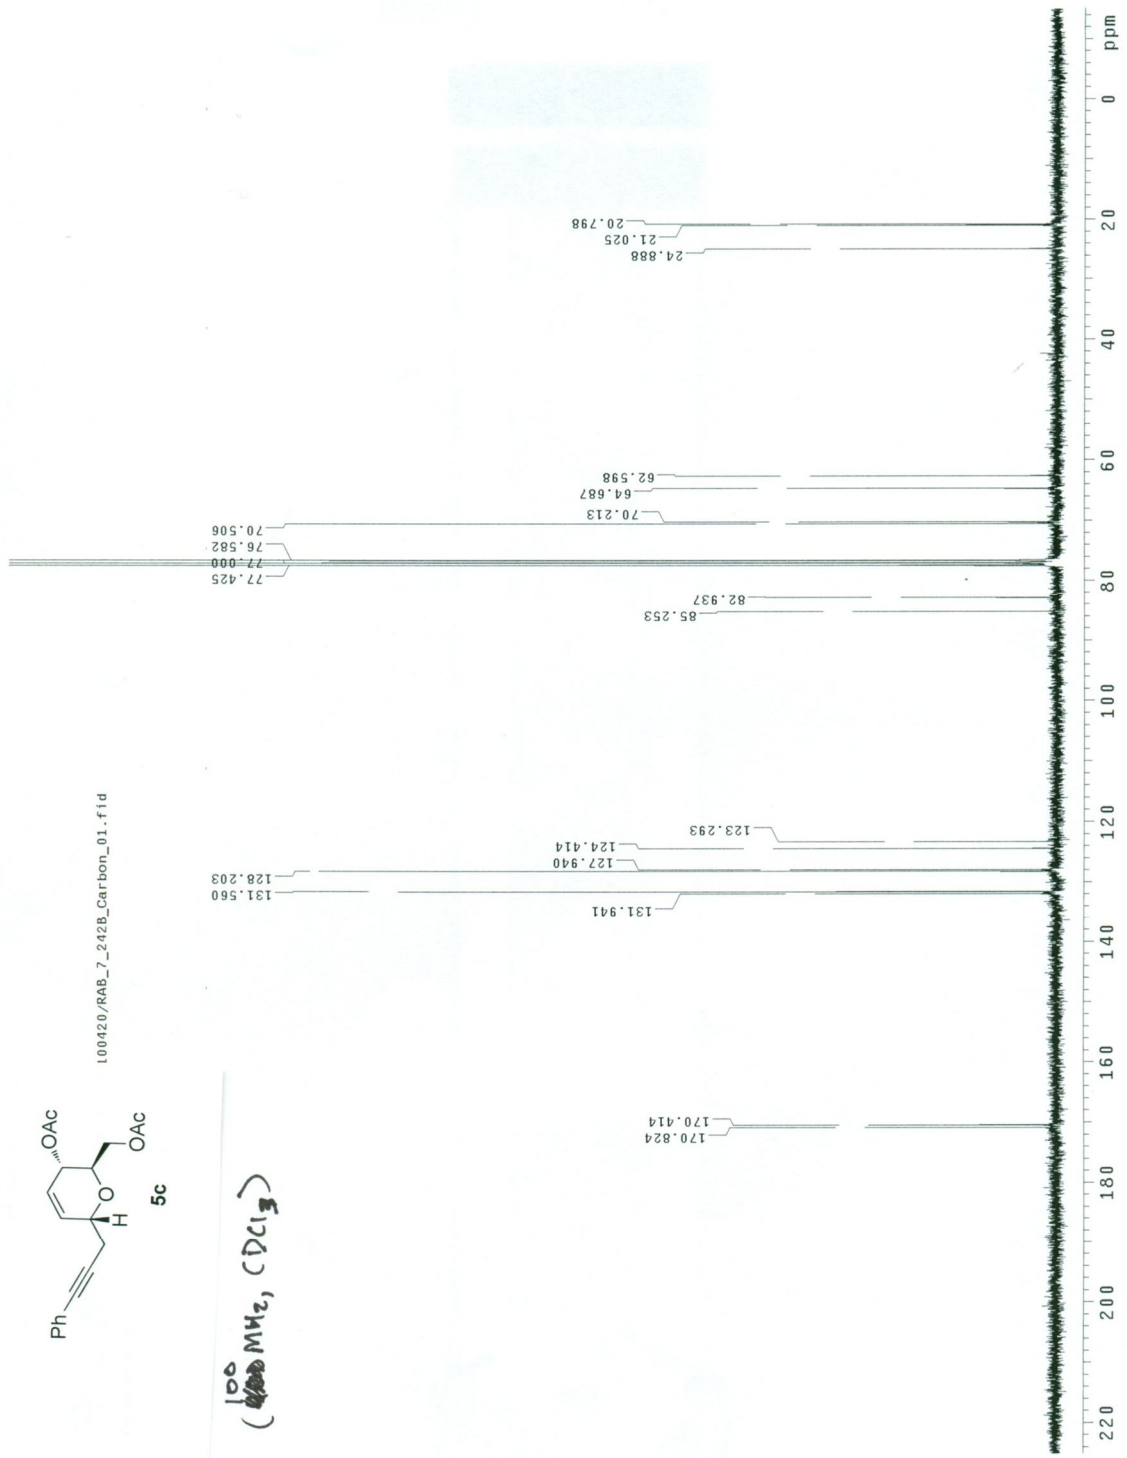



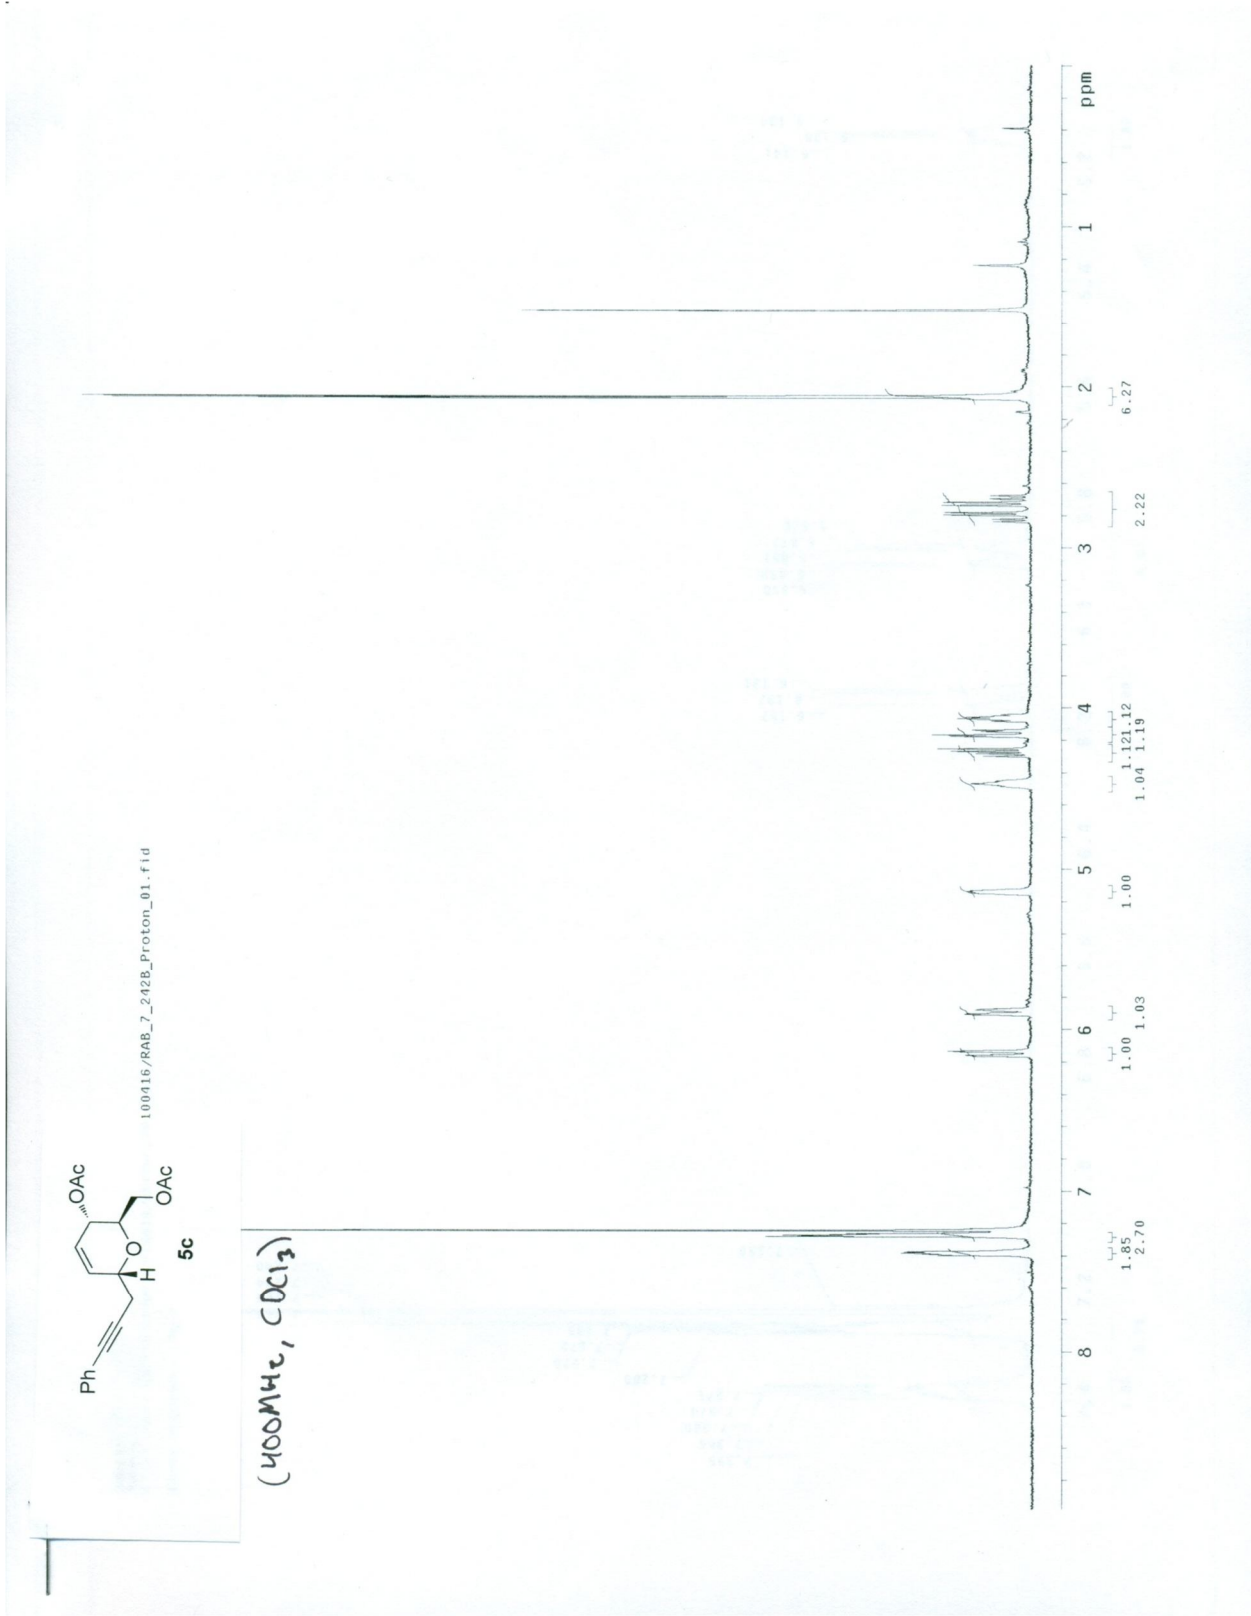

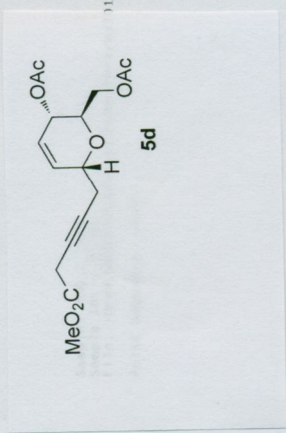

100 MHz, CDCl<sub>3</sub>

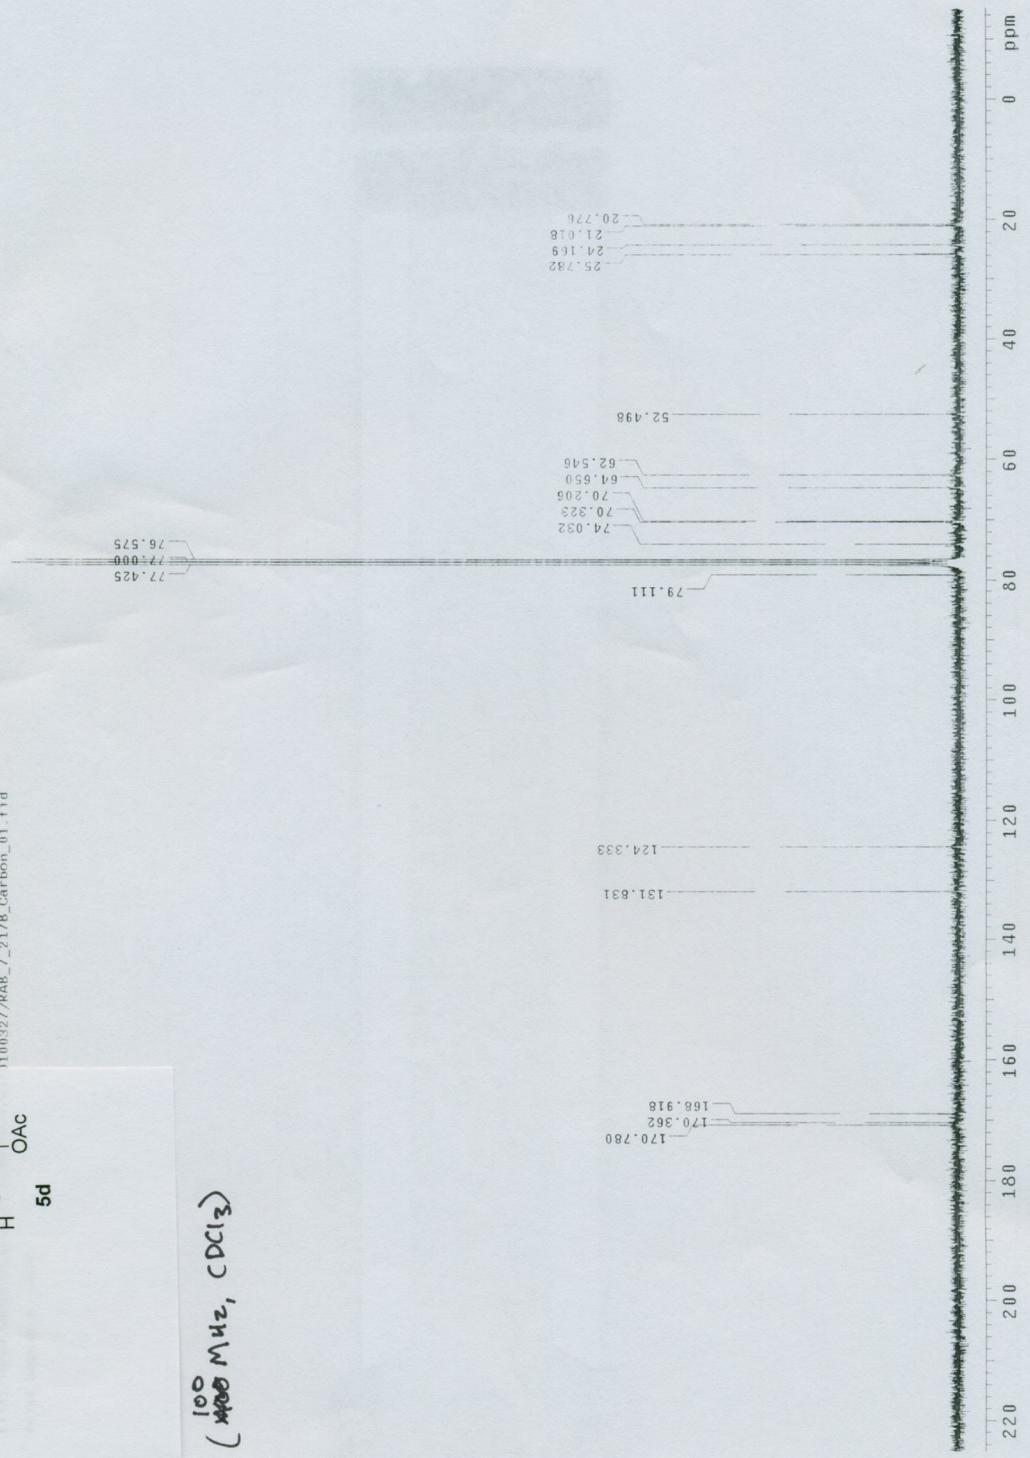

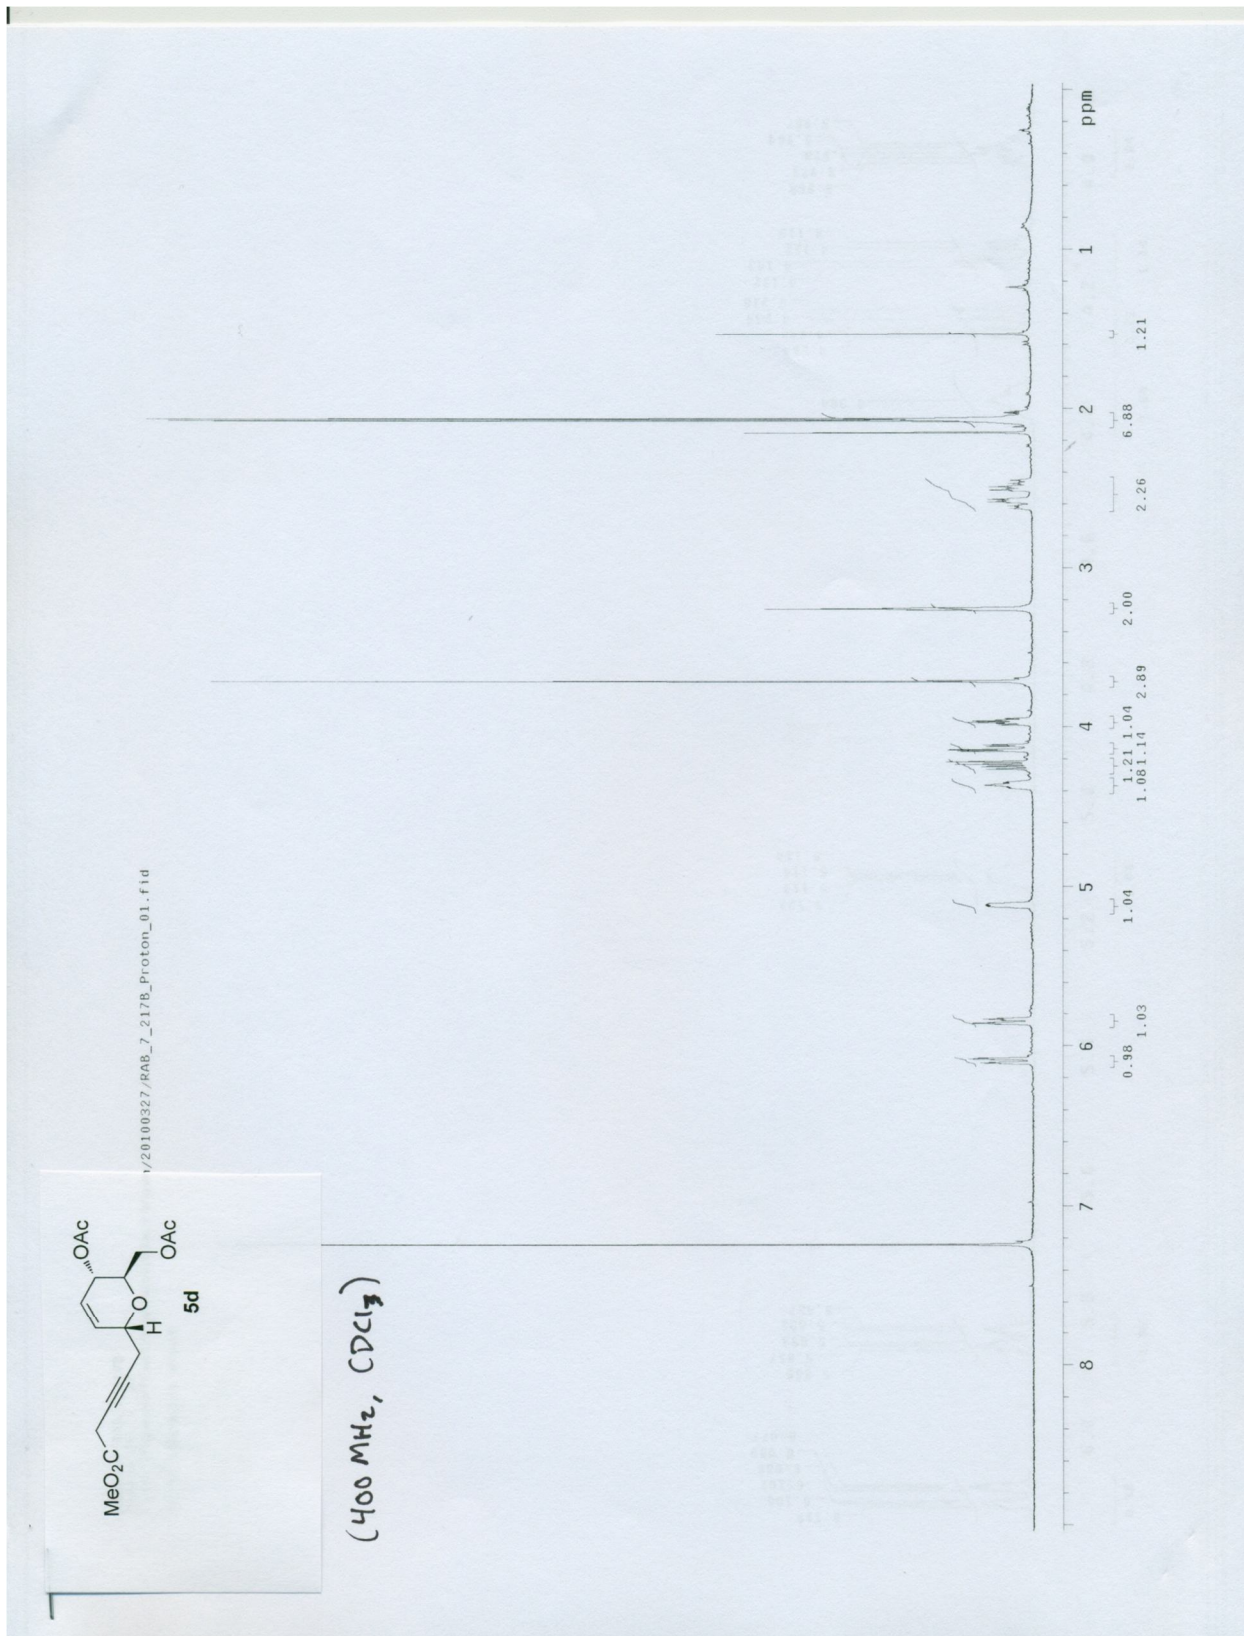

SI-31



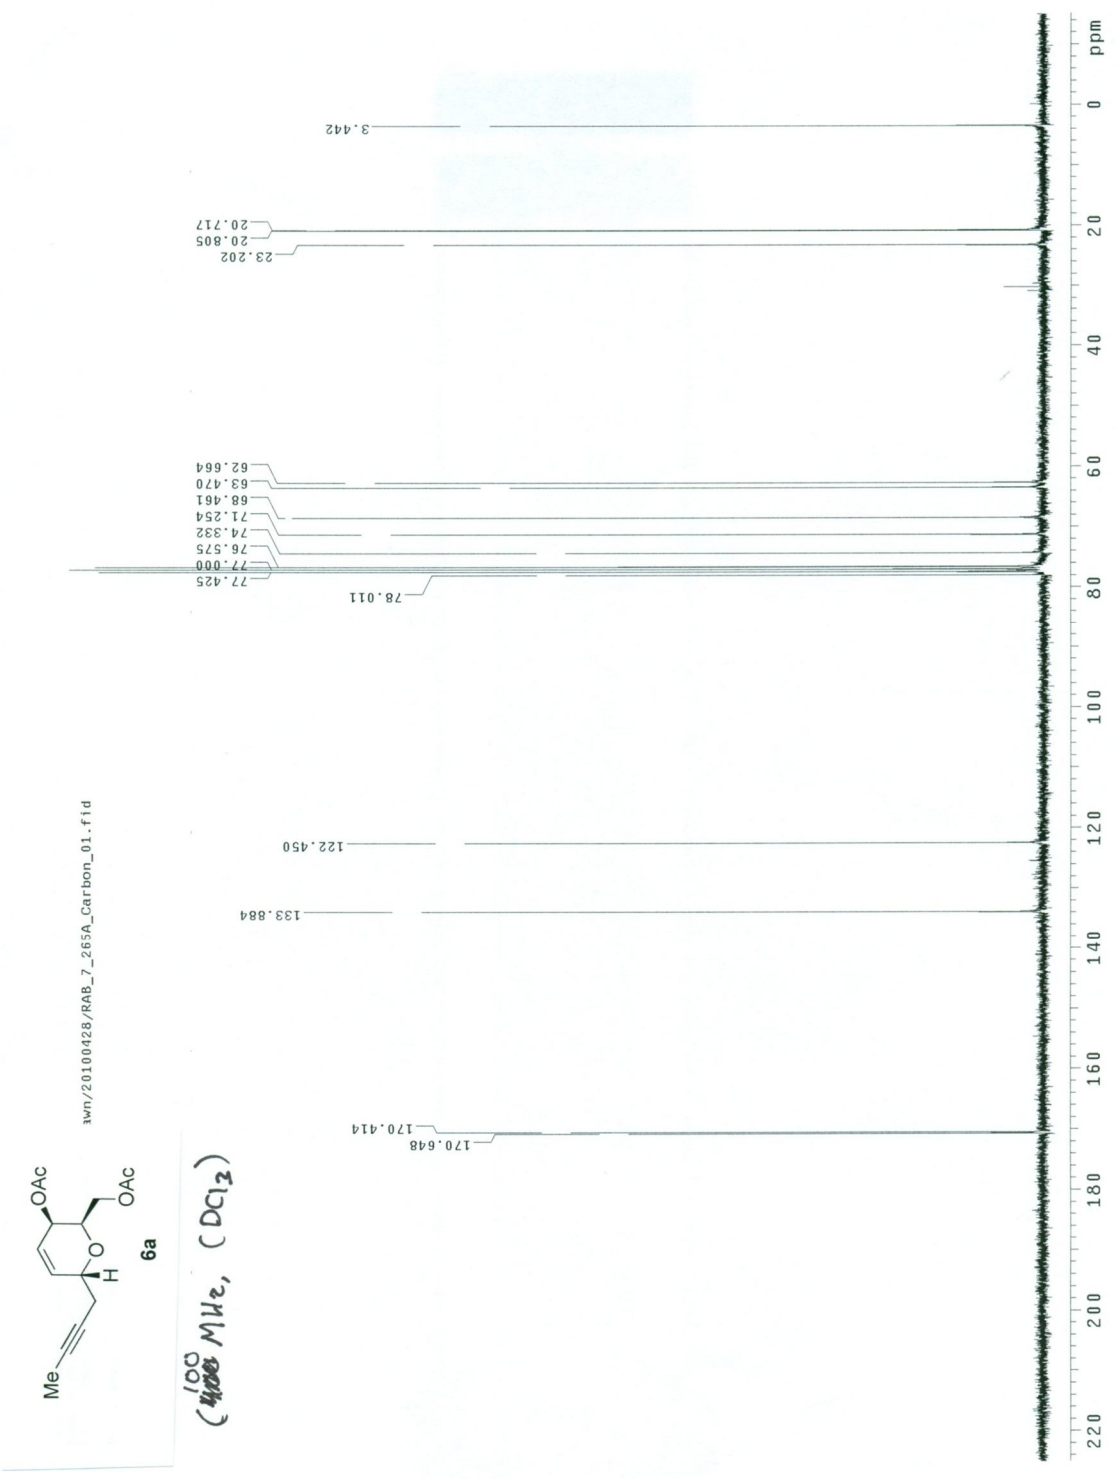

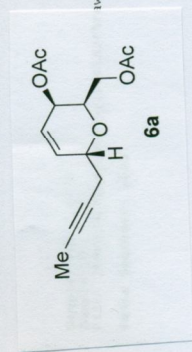

(400 MHz, CDCl<sub>3</sub>)

lmv/20100427/RAB\_7\_265A\_Proton\_01.Fid

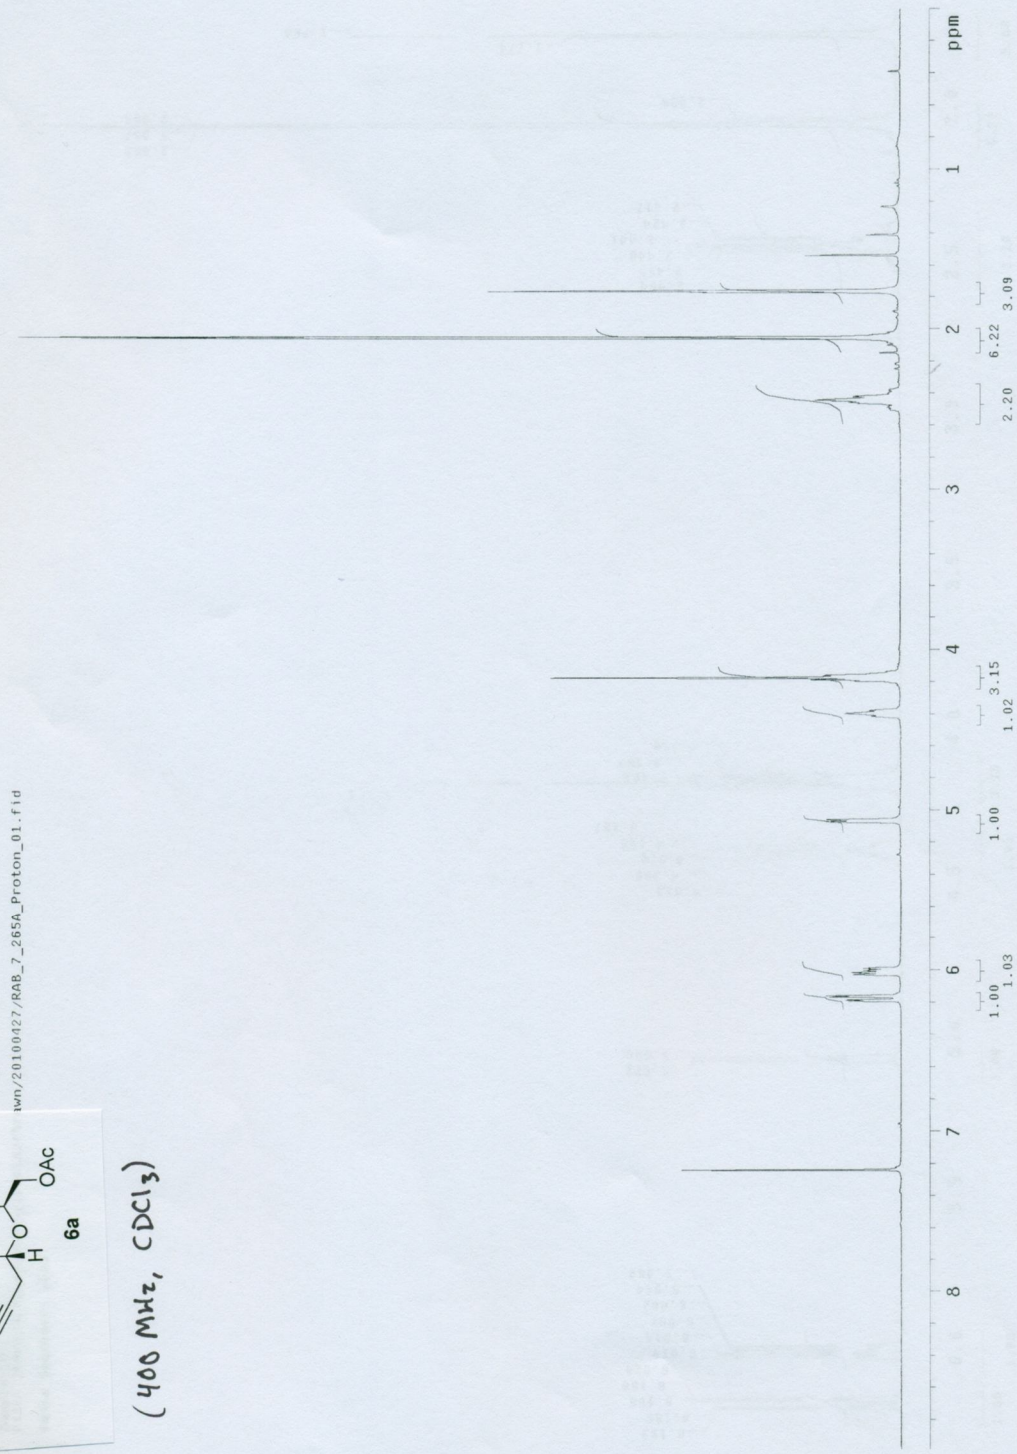

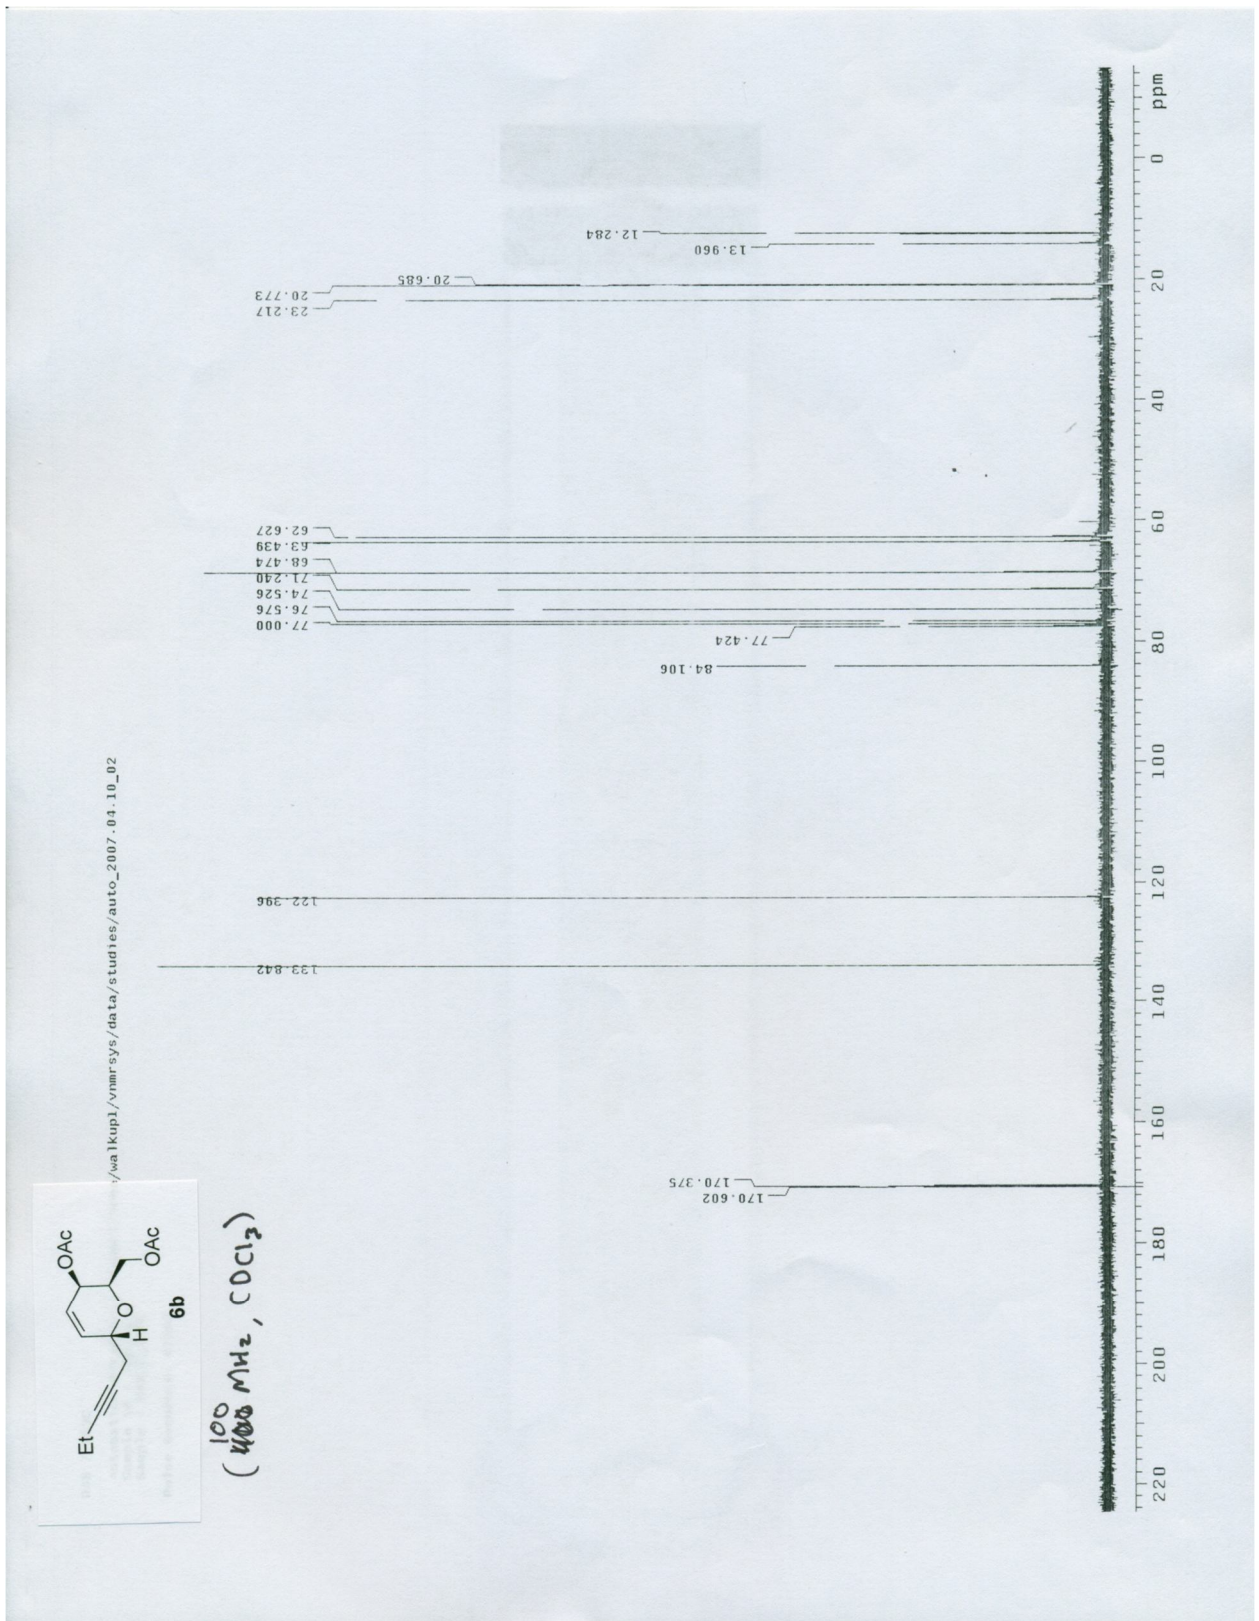

Supplement: NIHMS236689-supplement-2_si_002.pdf [file NIHMS236689-supplement-2_si_002.pdf]
